# Supplementary material for: Genome-Wide Evolutionary Characterization and Expression Analyses of WRKY Family Genes in Brachypodium distachyon
Source: PubMed Central journal article supplement (PMC4060952; doi:10.1093/dnares/dst060), 2014-01-21
Supplement: supp_dst060_dst060supp_tables.pdf [file supp_dst060_dst060supp_tables.pdf]

**Supplementary Table 1. The WRKY transcription factor family in *B. distachyon*.**

| <b>Gene Name</b> | <b>Location</b>          | <b>Gene Model</b> | <b>Comments</b> |
|------------------|--------------------------|-------------------|-----------------|
| <b>BdWRKY1</b>   | Bd2:14220256..14222873   | Bradi2g16150.1    | Group IIb       |
| <b>BdWRKY2</b>   | Bd2:3983627..3984262     | Bradi2g05510.1    | Group IIc       |
| <b>BdWRKY3</b>   | Bd2:58924622..58926999   | Bradi2g62130.1    | Group IIc       |
| <b>BdWRKY4</b>   | Bd2:9403194..9408009     | Bradi2g11170.1    | Group IIb       |
| <b>BdWRKY5</b>   | Bd2:6965062..6969356     | Bradi2g08620.1    | Group IIb       |
| <b>BdWRKY6</b>   | Bd3:17079694..17080883   | Bradi3g18580.1    | Group IId       |
| <b>BdWRKY7</b>   | Bd4:1276705..1278741     | Bradi4g01950.1    | Group I         |
| <b>BdWRKY8</b>   | Bd2:52655598..52657803   | Bradi2g53510.1    | -               |
| <b>BdWRKY9</b>   | Bd2:52646076..52649410   | Bradi2g53500.1    | Group III       |
| <b>BdWRKY10</b>  | Bd4:47804750..47805919   | Bradi4g44370.1    | Group III       |
| <b>BdWRKY11</b>  | Bd2:30388047..30389483   | Bradi2g30695.1    | Group III       |
| <b>BdWRKY12</b>  | Bd3:57392174..57394564   | Bradi3g57710.1    | Group IIb       |
| <b>BdWRKY13</b>  | Bd3:36924565..36925829   | Bradi3g34567.1    | Group IIe       |
| <b>BdWRKY14</b>  | Bd4:36119270..36124180   | Bradi4g30360.1    | Group IIa       |
| <b>BdWRKY15</b>  | Bd4:47786980..47788750   | Bradi4g44350.1    | Group III       |
| <b>BdWRKY16</b>  | Bd2:46341174..46344106   | Bradi2g45900.1    | Group IIc       |
| <b>BdWRKY17</b>  | Bd2:30398035..30400975   | Bradi2g30800.1    | Group III       |
| <b>BdWRKY18</b>  | Bd1:1580840..1582503     | Bradi1g02327.1    | Group I         |
| <b>BdWRKY19</b>  | Bd4:33637416..33639506   | Bradi4g28280.1    | Group III       |
| <b>BdWRKY20</b>  | Bd1:62421625..62422845   | Bradi1g63220.1    | Group III       |
| <b>BdWRKY21</b>  | Bd3:8007304..8009052     | Bradi3g09810.1    | Group IIe       |
| <b>BdWRKY22</b>  | Bd1:47430434..47433797   | Bradi1g48770.1    | Group III       |
| <b>BdWRKY23</b>  | Bd1:5717785..5722044     | Bradi1g08106.1    | Group IIc       |
| <b>BdWRKY24</b>  | Bd2:49173622..49177995   | Bradi2g49020.1    | Group IIc       |
| <b>BdWRKY25</b>  | Bd2: 52664751 - 52666466 | Bradi2g53520.1    | Group III       |
| <b>BdWRKY26</b>  | Bd4:21655844..21659743   | Bradi4g19060.1    | Group IIc       |
| <b>BdWRKY27</b>  | Bd1:5619653..5623406     | Bradi1g07970.1    | Group I         |
| <b>BdWRKY28</b>  | Bd1:14207355..14209349   | Bradi1g17660.1    | Group III       |
| <b>BdWRKY29</b>  | Bd4:47797837..47799556   | Bradi4g44360.1    | Group III       |
| <b>BdWRKY30</b>  | Bd2:13707176..13708809   | Bradi2g15360.1    | Group IIc       |
| <b>BdWRKY31</b>  | Bd1:11188915..11191904   | Bradi1g14300.1    | Group IId       |
| <b>BdWRKY32</b>  | Bd5:16639846..16643118   | Bradi5g13090.1    | Group I         |
| <b>BdWRKY33</b>  | Bd5:20674827..20679112   | Bradi5g17395.1    | Group IIc       |
| <b>BdWRKY34</b>  | Bd5:6203333..6204805     | Bradi5g04817.1    | Group IId       |
| <b>BdWRKY35</b>  | Bd5:23482100..23483388   | Bradi5g20700.1    | Group IId       |
| <b>BdWRKY36</b>  | Bd5:23193818..23196993   | Bradi5g20290.1    | Group IIe       |
| <b>BdWRKY37</b>  | Bd3:41662537..41665191   | Bradi3g39340.1    | Group I         |
| <b>BdWRKY38</b>  | Bd3:18514515..18520937   | Bradi3g19640.1    | Group I         |
| <b>BdWRKY39</b>  | Bd3:4354442..4356174     | Bradi3g06070.1    | Group IIa       |
| <b>BdWRKY40</b>  | Bd3:37214494..37216071   | Bradi3g34850.1    | Group III       |
| <b>BdWRKY41</b>  | Bd3:51584113..51587575   | Bradi3g50360.1    | Group IIc       |

|                 |                         |                |           |
|-----------------|-------------------------|----------------|-----------|
| <b>BdWRKY42</b> | Bd3:53316886..53321459  | Bradi3g52420.1 | Group IIe |
| <b>BdWRKY43</b> | Bd4:31073069..31076118  | Bradi4g25717.1 | Group III |
| <b>BdWRKY44</b> | Bd2:19779563..19782548  | Bradi2g22230.1 | Group III |
| <b>BdWRKY45</b> | Bd2:52860060..52862718  | Bradi2g53760.1 | Group I   |
| <b>BdWRKY46</b> | Bd2:19960366..19962573  | Bradi2g22440.1 | Group I   |
| <b>BdWRKY47</b> | Bd2:37371..39452        | Bradi2g00280.1 | Group I   |
| <b>BdWRKY48</b> | Bd2:3979821..3981719    | Bradi2g05500.1 | Group IIb |
| <b>BdWRKY49</b> | Bd2:3818524..3823413    | Bradi2g05234.1 | Group IIc |
| <b>BdWRKY50</b> | Bd2:33674703..33675549  | Bradi2g33540.1 | Group IIc |
| <b>BdWRKY51</b> | Bd2:14040691..14041846  | Bradi2g15877.1 | Group III |
| <b>BdWRKY52</b> | Bd2:42525077..42527076  | * LOC100843345 | Group IIc |
| <b>BdWRKY53</b> | Bd2:44578672..44580858  | Bradi2g44090.1 | Group IIc |
| <b>BdWRKY54</b> | Bd2:16801079..16803652  | Bradi2g19070.1 | Group IIc |
| <b>BdWRKY55</b> | Bd2:45857664..45858974  | Bradi2g45480.1 | Group III |
| <b>BdWRKY56</b> | Bd2:16474142..16475652  | Bradi2g18530.1 | Group IIc |
| <b>BdWRKY57</b> | Bd2:53553539..53556063  | Bradi2g54720.1 | Group IIc |
| <b>BdWRKY58</b> | Bd2:48426948..48428121  | Bradi2g48090.1 | Group IIc |
| <b>BdWRKY59</b> | Bd4:48418469..4842114   | Bradi4g45290.1 | Group I   |
| <b>BdWRKY60</b> | Bd4:39074575..39078767  | Bradi4g33370.1 | Group IIc |
| <b>BdWRKY61</b> | Bd4:5576052..5581378    | Bradi4g06690.1 | Group I   |
| <b>BdWRKY62</b> | Bd4:9350003..9357060    | Bradi4g09890.1 | Group I   |
| <b>BdWRKY63</b> | Bd4:1992609..1995531    | Bradi4g02680.1 | Group IId |
| <b>BdWRKY64</b> | Bd1:18715369..18721632  | Bradi1g23340.1 | Group I   |
| <b>BdWRKY65</b> | Bd1:46394072..46396455  | Bradi1g47690.1 | Group I   |
| <b>BdWRKY66</b> | Bd1:13042696..13049431  | Bradi1g16120.1 | Group I   |
| <b>BdWRKY67</b> | Bd1:18197079..18200281  | Bradi1g22680.1 | Group I   |
| <b>BdWRKY68</b> | Bd1:26329079..26330580  | Bradi1g30870.1 | Group IIa |
| <b>BdWRKY69</b> | Bd1:36017779..36022778  | * LOC100834454 | Group IIe |
| <b>BdWRKY70</b> | Bd1:49453669..49457672  | Bradi1g51030.1 | Group IIb |
| <b>BdWRKY71</b> | Bd1:58314278..58317315  | Bradi1g59180.1 | Group IIc |
| <b>BdWRKY72</b> | Bd1:10018214..10019283  | Bradi1g13207.1 | Group IIc |
| <b>BdWRKY73</b> | Bd1:723239..728467      | * LOC100845846 | Group IIe |
| <b>BdWRKY74</b> | Bd1:6545010..6548310    | Bradi1g09170.1 | Group IId |
| <b>BdWRKY75</b> | Bd1:70816062..70817256  | * LOC100837754 | -         |
| <b>BdWRKY76</b> | Bd2:14427911..14430851  | Bradi2g16357.1 | Group IIc |
| <b>BdWRKY77</b> | Bd2:49904315..49905775  | Bradi2g49906.1 | Group IIe |
| <b>BdWRKY78</b> | Bd1:63118295..63119746  | Bradi1g63910.1 | Group III |
| <b>BdWRKY79</b> | Bd2:44782012..44783510  | Bradi2g44270.1 | Group III |
| <b>BdWRKY80</b> | Bd2:49070580..49071586  | Bradi2g48907.1 | Group IIe |
| <b>BdWRKY81</b> | Bd2:13729497..13730737  | Bradi2g15405.1 | Group IIe |
| <b>BdWRKY82</b> | Bd2:44527990..44529664  | Bradi2g44035.1 | Group IIe |
| <b>BdWRKY83</b> | Bd2:19783798..19788797  | Bradi2g22240.1 | Group III |
| <b>BdWRKY84</b> | Bd2:52617265..52627264  | Bradi2g53480.1 | Group III |
| <b>BdWRKY85</b> | Bd2: 52632487..52636282 | Bradi2g53495.1 | Group III |

**BdWRKY86**

Bd4:47782844..47784664

Bradi4g44342.1

Group III

---

\* GeneBank Locus ID

**Supplementary table 2. The list of primer-sets of BdWRKY genes for qRT-PCR.**

| <b>Gene Name</b> | <b>Gene Model</b> | <b>Forward Primer</b> | <b>Reverse Primer</b> | <b>Tm-FP</b> | <b>Tm-RP</b> |
|------------------|-------------------|-----------------------|-----------------------|--------------|--------------|
| <b>BdWRKY1</b>   | Bradi2g16150.1    | GCGAGATGGACTTCTTCGAG  | TGGCCTCCATGTAGTGATGA  | 60.1         | 60.1         |
| <b>BdWRKY2</b>   | Bradi2g05510.1    | ATGGAAGCGGGAAACTTCTG  | ATGGAGGAGTAGCAGGCAAA  | 61.5         | 59.8         |
| <b>BdWRKY3</b>   | Bradi2g62130.1    | GAGGAATATTGGCAGGACGA  | CGAGATGAGCTTGTTACCA   | 60           | 60           |
| <b>BdWRKY4</b>   | Bradi2g11170.1    | GCAATAGGAGGACGGTTCAA  | TACTTCCTCCATTGGCATCC  | 60.1         | 59.9         |
| <b>BdWRKY5</b>   | Bradi2g08620.1    | CAGGATTCTCGATCCATTCC  | CAAGTTGAGGAACCCGAGAG  | 59.4         | 59.8         |
| <b>BdWRKY6</b>   | Bradi3g18580.1    | CCGTGACTTCCACATCCTTC  | GGAGTTGCTGTTGGAGCTTG  | 60.5         | 61           |
| <b>BdWRKY7</b>   | Bradi4g01950.1    | CCTCGCACTTGTCCTCCTAC  | AAGAATTTGTTTGGGCGTTG  | 59.9         | 60           |
| <b>BdWRKY8</b>   | Bradi2g53510.1    | ACGGGTACATGTGGAGGAAG  | TGCTCGTGGACGTAGATGAC  | 59.8         | 59.9         |
| <b>BdWRKY9</b>   | Bradi2g53500.1    | CGAAGGCGGGTATAATCTCA  | GCGTTTATCTTTGGCTGGAG  | 60           | 59.9         |
| <b>BdWRKY10</b>  | Bradi4g44370.1    | ATGGCGGATGACAAGAAGAG  | GTAGCTCCTTGGGTGCTTTG  | 60.2         | 59.9         |
| <b>BdWRKY11</b>  | Bradi2g30695.1    | AGAAGGACCCAGCAATCCTC  | ACCCTGAAGGTGTCCTTGTC  | 60.6         | 59           |
| <b>BdWRKY12</b>  | Bradi3g57710.1    | ACAAGGTGAGGTACCGATGG  | CGGAGCATCTTGTTCTCCTC  | 59.8         | 60           |
| <b>BdWRKY13</b>  | Bradi3g34567.1    | ATCTCTCGGATGTGGTGAGG  | GGCATCATCCGTCATAATCC  | 60.1         | 60.1         |
| <b>BdWRKY14</b>  | Bradi4g30360.1    | GGGTATCAATGGCGGAAGTA  | ACGCAGCTCGAAGTAAGCTC  | 59.8         | 59.8         |
| <b>BdWRKY15</b>  | Bradi4g44350.1    | ACCAATGTTCCCCACTACGA  | TGCCATTGCTAATGTTCTCG  | 60.2         | 59.8         |
| <b>BdWRKY16</b>  | Bradi2g45900.1    | CGATGAAGGTGACAAGAGCA  | TTCTTCACCACGCACTTCTG  | 60           | 60           |
| <b>BdWRKY17</b>  | Bradi2g30800.1    | CTACCGTGCCTCACAAGA    | GGTTGGAGAATTGGTCGTTG  | 59.9         | 60.4         |
| <b>BdWRKY18</b>  | Bradi1g02327.1    | GGTTGCTGAGCTTTTGAAGG  | GAGAAGTAATCGGCGTGGA   | 60           | 60.2         |
| <b>BdWRKY19</b>  | Bradi4g28280.1    | CGTCTCCGACATGACTTCA   | TGCTTGCTCCAAGAATCTC   | 59.8         | 60.5         |
| <b>BdWRKY20</b>  | Bradi1g63220.1    | CACGCACAAATCAGACCAAG  | TAAAGTCTGCGGAAACTGA   | 60.3         | 59.8         |
| <b>BdWRKY21</b>  | Bradi3g09810.1    | GTGCCGAGATCCAAGAGAAG  | GCTGCTGCACCGGTAGTATC  | 60           | 60.8         |
| <b>BdWRKY22</b>  | Bradi1g48770.1    | CAAAGCGTGTGCAAGAGAAG  | ACCGGTAGTAACCCCTTGA   | 59.8         | 60.6         |
| <b>BdWRKY23</b>  | Bradi1g08106.1    | GAGACTGGCGTTAGCTCGAC  | ACTCCAGGAGGCACGATGTC  | 60.2         | 62.6         |
| <b>BdWRKY24</b>  | Bradi2g49020.1    | TACCGGTGGAGAAAGTACGG  | CGGGAGAGAACTGAAGCTG   | 60           | 60           |
| <b>BdWRKY25</b>  | Bradi2g53520.1    | TTCCTCAACTTGCTATCGCC  | AGACCCGGCTCTTCTCATG   | 60.4         | 61.7         |
| <b>BdWRKY26</b>  | Bradi4g19060.1    | GAACAACAACCTCCCCAGGA  | TGTGGTTGCTAAAGGCTGTG  | 59.9         | 59.9         |
| <b>BdWRKY27</b>  | Bradi1g07970.1    | CCGTCCCAGGAGCTACTACA  | CCTTGAGCTGACGAGCAGTA  | 60.3         | 59.3         |
| <b>BdWRKY28</b>  | Bradi1g17660.1    | TCCTCATCCATGCTCTTCC   | GCGACGAAGGGAAGCTACTA  | 60.2         | 59.6         |
| <b>BdWRKY29</b>  | Bradi4g44360.1    | AGTCCTTGGTGTGGTGAGG   | GCAGCTCCGTTCTTTGTAGG  | 60           | 60           |
| <b>BdWRKY30</b>  | Bradi2g15360.1    | AACGGTTGAAGAAGAAGCA   | GCACCGGTAGTAGCTCCTTG  | 59.9         | 59.9         |
| <b>BdWRKY31</b>  | Bradi1g14300.1    | GGCTAAACTCCTCAGCAACG  | TCGAAGGATGGGCACTATTC  | 60           | 60           |
| <b>BdWRKY32</b>  | Bradi5g13090.1    | CAACCACAGGGAAGTTGTTC  | ATGCTGGTTGCTGGGTAAAG  | 58           | 60.1         |
| <b>BdWRKY33</b>  | Bradi5g17395.1    | ATGGCGTGATGTTTTCTTCC  | GCCATGTCTAGTTGCAGTGG  | 59.9         | 59.3         |
| <b>BdWRKY34</b>  | Bradi5g04817.1    | GATCTGATGGGAGGATACGG  | CTTGAACCTGGACACCGTCA  | 59.3         | 59.7         |
| <b>BdWRKY35</b>  | Bradi5g20700.1    | TCCACCTCCTTCTTCTCGTC  | CTTCACGCGTTCTTCTTTC   | 59.4         | 60           |
| <b>BdWRKY36</b>  | Bradi5g20290.1    | TGCTCGTCATCACCTACACC  | TTGTGCTAGTGGTCGTCGTC  | 59.7         | 59.9         |
| <b>BdWRKY37</b>  | Bradi3g39340.1    | CCACCAATTTTCCAACCAC   | TCTCGGTCTGCATCACACTC  | 60.1         | 60           |
| <b>BdWRKY38</b>  | Bradi3g19640.1    | AGTGATTGTGAAGGGGATGC  | TACGCCATCTGTACCCATCA  | 59.9         | 59.9         |
| <b>BdWRKY39</b>  | Bradi3g06070.1    | CGTCGAGGAGAACTTCTTGC  | TGGTCATGTCGCTGTAAGG   | 60.1         | 60.7         |
| <b>BdWRKY40</b>  | Bradi3g34850.1    | GGGCATAGCTGGAGGAAGTA  | CGTGGTAGACGACGTCAAAG  | 59.3         | 59.4         |
| <b>BdWRKY41</b>  | Bradi3g50360.1    | AGAAGCCGTAATGCTCTCCA  | TTATTAGCACCTCGCATCC   | 60           | 60.1         |

|                 |                |                         |                         |      |      |
|-----------------|----------------|-------------------------|-------------------------|------|------|
| <b>BdWRKY42</b> | Bradi3g52420.1 | TCAGAGGACTGCAGATGTCTG   | CCAGAGATCCGAAGGAACAA    | 60.1 | 60.2 |
| <b>BdWRKY43</b> | Bradi4g25717.1 | AATCTGCTTCGGCTCAAGTG    | GATCGACGAAGACGAAGAGC    | 60.5 | 60.1 |
| <b>BdWRKY44</b> | Bradi2g22230.1 | CTTCGATTTCTTCCCAACA     | ACCACTTGAGGCATCCTGAC    | 60   | 60.1 |
| <b>BdWRKY45</b> | Bradi2g53760.1 | TCCGACTTCTCGTTCCAGAC    | GAAGCTCGCTGGGTTGTTAG    | 60.4 | 60   |
| <b>BdWRKY46</b> | Bradi2g22440.1 | CAACATGCTCGGAAACAATG    | GCTCCACCTTCTTCTTCGTG    | 60.1 | 60   |
| <b>BdWRKY47</b> | Bradi2g00280.1 | GAAAGTACGGGCAGAAGCAG    | ACGGGTGGAGAGGTGTTATG    | 60   | 59.8 |
| <b>BdWRKY48</b> | Bradi2g05500.1 | CAACAAGCAGGAGGAGGAAG    | TGAGAGGATTTGGGCTTGAC    | 60   | 60   |
| <b>BdWRKY49</b> | Bradi2g05234.1 | TCAAAGGTTGCACTCGATCA    | CAGCTGCTTTCTTCATCCTC    | 60.3 | 57.8 |
| <b>BdWRKY50</b> | Bradi2g33540.1 | CGACTCCACCGGTCTTCTTA    | CCGAGCAGCGGTAGTAGTTC    | 60.2 | 60   |
| <b>BdWRKY51</b> | Bradi2g15877.1 | ACCTGCAGAGACACGATCAG    | GGATCCAGGAACAACAGCTC    | 59   | 59.7 |
| <b>BdWRKY52</b> | * LOC100843345 | CAGCAAAGCAGCAAGTTCAG    | TCTTGCCGTACTIONCTCCAC   | 59.9 | 60.3 |
| <b>BdWRKY53</b> | Bradi2g44090.1 | TGGCCAAGGATAATGAGGAG    | GCACCGGTAGTAGCTCCTTG    | 60   | 59.9 |
| <b>BdWRKY54</b> | Bradi2g19070.1 | AGGGGATCAAAGGGAACAAC    | GCACCGGTAGTAGCTCCTTG    | 60.2 | 59.9 |
| <b>BdWRKY55</b> | Bradi2g45480.1 | CTCTTCGACGTCGTGTACCA    | CTTATTGGAGGGGAACGACA    | 59.9 | 59.9 |
| <b>BdWRKY56</b> | Bradi2g18530.1 | GTCGCTGCTCTTGGTAGGAG    | GGACTTCTTGCCGTACTIONTC  | 60.2 | 59.9 |
| <b>BdWRKY57</b> | Bradi2g54720.1 | ACGTAGGAGGAGGAGGAAGC    | GCAAGTCGAGGCAATACCAG    | 59.8 | 60.8 |
| <b>BdWRKY58</b> | Bradi2g48090.1 | GACGGGTACAAGTGGAGGAA    | CCGGAAGTAGCATCTTGAGC    | 60   | 60   |
| <b>BdWRKY59</b> | Bradi4g45290.1 | CATGGTTTGGGGAGGCTATG    | GAGCTCGGCCAAGAAAAGTA    | 62.5 | 59.6 |
| <b>BdWRKY60</b> | Bradi4g33370.1 | TCGACTCTGCATCTTTGTGG    | CATGTGTTGCCCTGTCAATC    | 60   | 60   |
| <b>BdWRKY61</b> | Bradi4g06690.1 | TGAGCTCTGCAGCCAATATG    | TTGGGCAATCACTIONACCCTTC | 60.1 | 59.9 |
| <b>BdWRKY62</b> | Bradi4g09890.1 | CAGGGCACTCAAACAATGTG    | ACTCAAAGGGGAATGCAATG    | 60.1 | 59.9 |
| <b>BdWRKY63</b> | Bradi4g02680.1 | AAGATGGTCCAGCCATTGTC    | TGTCCAAGCTAGCCACACTG    | 59.9 | 60   |
| <b>BdWRKY64</b> | Bradi1g23340.1 | TTCAAACCAGGGTGAAGACC    | GCAGCATCAATACCAGCAGA    | 59.9 | 60   |
| <b>BdWRKY65</b> | Bradi1g47690.1 | TGTGCACCCAATTTTGAGAA    | GCGTGGAACCAGTGGTAGTG    | 60.1 | 61.6 |
| <b>BdWRKY66</b> | Bradi1g16120.1 | CATCGACAAGCCTTAGCACA    | GTAAGTGATGGTGGGGTTGG    | 60   | 60.1 |
| <b>BdWRKY67</b> | Bradi1g22680.1 | GGAAGGGGGAGATGAGAAAAG   | TAGCCATCGTCCAAAAGGTC    | 60   | 60.1 |
| <b>BdWRKY68</b> | Bradi1g30870.1 | GTCGAGGAGGACTTCATGTC    | TTGTTATTGGCTTCCGCTTG    | 57.2 | 61   |
| <b>BdWRKY69</b> | * LOC100834454 | CCCTCATCTCACCTACACC     | TGGTCCCTCCATCTCCATCTC   | 59.4 | 60   |
| <b>BdWRKY70</b> | Bradi1g51030.1 | CTCACTCTCACTCGCCCTTC    | ACGAGGATCCTGACAACGAC    | 60.1 | 60.1 |
| <b>BdWRKY71</b> | Bradi1g59180.1 | GGCCATCACCTCCTCTACAA    | TGTCAACGGCAGGAACTGTA    | 60.1 | 60.3 |
| <b>BdWRKY72</b> | Bradi1g13207.1 | AGTGGAAGAAGTACGGCCAG    | TGCAGGAGGAAGACGATGAC    | 60.1 | 61.4 |
| <b>BdWRKY73</b> | * LOC100845846 | CTCACCAGCAGTCAGCTCAG    | TGGGTTTCTGGCCATACTIONTC | 59.9 | 59.9 |
| <b>BdWRKY74</b> | Bradi1g09170.1 | AGCCTCCAAGATCACC AATG   | GACTAGTGTTCCGGCTCAGG    | 60.1 | 59.9 |
| <b>BdWRKY75</b> | * LOC100837754 | GTGTGTGGACTATCGCCACC    | ATGCCCACTIONTGTGATTTGA  | 61.1 | 60   |
| <b>BdWRKY76</b> | Bradi2g16357.1 | CAACAATGGGAAAGGGAAGA    | GCACCGGTAGTAGCTCCTTG    | 59.9 | 59.9 |
| <b>BdWRKY77</b> | Bradi2g49906.1 | GCTCGTCACCTACTCCTTCG    | GTTCTGATCCTGCTCTTGC     | 60   | 60   |
| <b>BdWRKY78</b> | Bradi1g63910.1 | TTACCCCCACAGAGTTCCAG    | TCAGTGCAGACCTGCTTTTG    | 60   | 60.2 |
| <b>BdWRKY79</b> | Bradi2g44270.1 | GATCGGAGGTGCAGAGAGAG    | CCGAGTTCTGGATGTCCCTTC   | 60.1 | 59.7 |
| <b>BdWRKY80</b> | Bradi2g48907.1 | CCTACGAGCACAACCACTIONCA | CGTAGAGCAGCAGGTCGTC     | 59.9 | 59.7 |
| <b>BdWRKY81</b> | Bradi2g15405.1 | GCAGGAAGAGCCAAGTGAAG    | GCAGTGGTCAGCAATGTAGG    | 60.1 | 59.3 |
| <b>BdWRKY82</b> | Bradi2g44035.1 | ATTTGGATCACAAGCCGTTTC   | CCACCTTCTTCAGCTGGCTC    | 59.9 | 62.4 |
| <b>BdWRKY83</b> | Bradi2g22240.1 | GGACGGGTACATATGGAGGA    | GCGGCTGTGGTGGTAGTAAC    | 59.6 | 60.6 |
| <b>BdWRKY84</b> | Bradi2g53480.1 | TTCGATGGAGCCAACAAAAG    | TTGCCCTGATCATCTTCTG     | 61.1 | 61.1 |

|                 |                |                        |                        |      |      |
|-----------------|----------------|------------------------|------------------------|------|------|
| <b>BdWRKY85</b> | Bradi2g53495.1 | CCATCATCACGAGCATCATC   | ATTCAGCCCGTATCTCAACG   | 60   | 60.1 |
| <b>BdWRKY86</b> | Bradi4g44342.1 | TTGCTGGGATGCAAGTACAG   | TTGGCAGCTGTTGAGAACAC   | 59.8 | 60   |
| <b>BdActin</b>  | Bradi2g24070.1 | CCCGATGGACAGGTTATCACTA | ATAGAGCCACCAATCCAAACAC | 61.1 | 60.2 |

---

\* GeneBank Locus ID

**Supplementary table 3. The WRKY domain sequences from *O. sativa*, *A. thaliana* and *B. distachyon*.**

| name     | gene model | WRKY domain                                                              |
|----------|------------|--------------------------------------------------------------------------|
| AtWRKY1N | At2g04880  | IREKVMEDGYNWRKYGQKLVKGNFVRSYYRCTHPNCK<br>AKKQLERSAGGQVVDTVYFGEHDHPKP     |
| AtWRKY1C | At2g04880  | TLFDIVNDGYRWRKYGQKSVKGSYPYRCSYRCSGPGCV<br>KKHVERSSHDTKLLITTYEGKHDHDMF    |
| AtWRKY2N | At5g56270  | AGGAPAEDGYNWRKYGQKLVKGSYPRSYKCTNPNCQ<br>VKKKVERSREGHITEIYKGAHNHLKP       |
| AtWRKY2C | At5g56270  | SDVDLDDGYRWRKYGQKVVKGNPNRPSYKCTAPGCT<br>VRKHVERASHDLKSVITTYEGKHNHDVP     |
| AtWRKY3N | At2g03340  | NADKPADDGYNWRKYGQKQVKGSDFPRSYKCTHPACP<br>VKKKVERSLDGQVTEIYKQHNHELP       |
| AtWRKY3C | At2g03340  | SEVDLLDDGYRWRKYGQKVVKGNPYPRSYKCTTPDCG<br>VRKHVERAATDPKAVVTTYEGKHNHDVP    |
| AtWRKY4N | At1g13960  | NVDKPADDGYNWRKYGQKQVKGSDFPRSYKCTNPGPC<br>VKKKVERSLDGQVTEIYKQHNHEPP       |
| AtWRKY4C | At1g13960  | SEVDLLDDGYRWRKYGQKVVKGNPYPRSYKCTTPGCG<br>VRKHVERAATDPKAVVTTYEGKHNHDLP    |
| AtWRKY6  | At1g62300  | SEAPMISDGCQWRKYGQKMAKGNPCPRAYRCTMATGC<br>PVRKQVQRCAEDRSILITTYEGNHNHPLP   |
| AtWRKY7  | At4g24240  | KMADIPSDEFSWRKYGQKPIKGSPPHPRGYKCSSVRGCPA<br>RKHVERALDDAMMLIVTYEGDHNHALV  |
| AtWRKY8  | At5g46350  | TEVDHLEDGYRWRKYGQKAVKNSPYPRSYRCTTQKCN<br>VKKRVERSYQDPTVVITTYESQHNHPIP    |
| AtWRKY9  | At1g68150  | CETATMNDGCQWRKYGQKTAKGNPCPRAYRCTVAPGC<br>PVRKQVQRCLDMSILITTYEGTHNHPLP    |
| AtWRKY10 | At1g55600  | SDEDNPNDGYRWRKYGQKVVKGNPNRPSYFKCTNIECRV<br>KKHVERGADNIKLVVTTYDGIHNHPSF   |
| AtWRKY11 | At4g31550  | KIADIPPDEYSWRKYGQKPIKGSPPHPRGYKCSFRGCPA<br>RKHVERALDDPAMLIVTYEGEHRHNQS   |
| AtWRKY12 | At2g44745  | SDVDVLDDGYKWRKYGQKVVKNSLHPRSYYRCTHNNCR<br>VKKRVERLSEDCRMVITTYEGRHNHIPS   |
| AtWRKY13 | At4g39410  | SEVDVLDDGYRWRKYGQKVVKNTQHPRSYYRCTQDKCR<br>VKKRVERLADDPRMVITTYEGRHLHSPS   |
| AtWRKY14 | At1g30650  | SGEVVPSDLWAWRKYGQKPIKGSPPHPRGYRCSYKCSGCS<br>ARKQVERSRTDPNMLVITYTSEHNHPWP |
| AtWRKY15 | At2g23320  | KMSDVPPDDYSWRKYGQKPIKGSPPHPRGYKCSYRGCPC<br>ARKHVERAADDSSMLIVTYEGDHNHSLS  |
| AtWRKY16 | At5g45050  | DRGSRSSDLVWRKYGQKPIKSSPYPRSYRCASSKGCFC<br>ARKQVERSRTDPNVSVITYISEHNHPFP   |

|           |           |                                                                                                                  |
|-----------|-----------|------------------------------------------------------------------------------------------------------------------|
| AtWRKY17  | At2g24570 | KIADIPPDEYSWRKYGQKPIKGSPPHPRGYKCSFRGCPA<br>RKHVERALDDSTMLIVTYEGEHRHHQS                                           |
| AtWRKY18  | At4g31800 | DTSLTVKDGDFQWRKYGQKVTRDNPSRAYFRCSFAPSCP<br>VKKKVQRSAEDPSLLVATYEGTHNHLGP                                          |
| AtWRKY19N | At4g12020 | NVDKQVNDGYNWQKYGQKKVKGSKFPLSYKCTYLGC<br>PSKRKVERSLDGQVAEIVYKDRHNHEPP                                             |
| AtWRKY19C | At4g12020 | SEVDNLDDGYRWRKYGQKVVKGNPYPRFSSSKDYDVVI<br>RYGRADISNEDFISHLRASLCRRGISVYEKFNEDALPKCR<br>VLIIVLTSTYVPSNLLNILEHQHTED |
| AtWRKY20N | At4g26640 | TPSILADDGYNWRKYGQKHVKGSEFPRSYYKCTHPNCEV<br>KKLFERSHDGQITDIIYKGTDHHPKP                                            |
| AtWRKY20C | At4g26640 | SEVDILDDGYRWRKYGQKVVRGNPNPRSYYKCTAHGCP<br>VRKHVERASHDPKAVITTYEGKHDHDVP                                           |
| AtWRKY21  | At2g30590 | KVADIPPDDYSWRKYGQKPIKGSPPYPRGYKCSSMRGCP<br>ARKHVERCLEDPAMLIVTYEAEHNHPKL                                          |
| AtWRKY22  | At4g01250 | AAEALNSDVWAWRKYGQKPIKGSPPYPRGYRCSTSKGCL<br>ARKQVERNRSDPKMFIVTYTAEHNHPAP                                          |
| AtWRKY23  | At2g47260 | SEVDHLEDGYRWRKYGQKAVKNSPFPRSYYRCTTASCNV<br>KKRVERFRDPSTVVTTYEGQHTHISP                                            |
| AtWRKY24  | At5g41570 | SDDDVLDDGYRWRKYGQKSVKHNAHPRSYYRCTYHTCN<br>VKKQVQRLAKDPNVVVTTYEGVHNHPCE                                           |
| AtWRKY25N | At2g30250 | MVSRNSNDGYWRKYGQKQVKKSENPRSYPFKCTYPDCV<br>SKKIVETASDGQITEIYKGGHNHPKP                                             |
| AtWRKY25C | At2g30250 | SDIDVLIDGFRWRKYGQKVVKGNTNPRSYYKCTFQCGGV<br>KKQVERSAADERAVLTTYEGRHNHDIP                                           |
| AtWRKY26N | At5g07100 | SSNKTSDDGYNWRKYGQKQVKGSENPRSYPFKCTYPNCLT<br>KKKVETSLVKGQMIIVYKGSHNHPKP                                           |
| AtWRKY26C | At5g07100 | SDIDILDDGYRWRKYGQKVVKGNPNPRSYYKCTFTGCFV<br>RKHVERAFQDPKSVITTYEGKHKHQIP                                           |
| AtWRKY27  | At5g52830 | TQENLSSDLWAWRKYGQKPIKGSPPYPRNYYRCSSSKGCL<br>ARKQVERSNLDPNIFIVTYTGEHTHPRP                                         |
| AtWRKY28  | At4g18170 | SEVDHLEDGYRWRKYGQKAVKNSPYPRSYYRCTTQKCN<br>VKKRVERSFQDPTVVITTYEGQHNHPIP                                           |
| AtWRKY29  | At4g23550 | KEENLLSDAWAWRKYGQKPIKGSPPYPRSYYRCSSSKGCL<br>ARKQVERNPNPEKFTITYTNEHNHELP                                          |
| AtWRKY30  | At5g24110 | GVDRTLDDGFSWRKYGQKDILGAKFPRGYRCTYRKSQ<br>GCEATKQVQRSDENQMLLEISYRGIHSCSQA                                         |
| AtWRKY31  | At4g22070 | SEAAMISDGCQWRKYGQKMAKGNPCPRAYRCTMAGG<br>CPVRKQVQRCAEDRSILITTYEGNHNHPLP                                           |
| AtWRKY32N | At4g30935 | VPRTPARDGYNWRKYGQKQVKSPKGSRSYYRCTYTECC<br>AKKIECSNDSGNVVEIVNKGLHTHEPP                                            |
| AtWRKY32C | At4g30935 | GDVGICGDGYRWRKYGQKMVKGNPHPRNYYRCTSAGCP<br>VRKHIEAVENTKAVIITYKGVHNHDMP                                            |



|           |           |                                                                            |
|-----------|-----------|----------------------------------------------------------------------------|
| AtWRKY33N | At2g38470 | REQRKGEDGYNWRKYGQKQVKGSENPRSYKCTFPNCP<br>TKKKVERSLEGQITEIVYKGSNHHPKP       |
| AtWRKY33C | At2g38470 | SDIDILDDGYRWRKYGQKVVKGNPNPRSYKCTTIGCPV<br>RKHVERASHDMRAVITTYEGKHNHDVP      |
| AtWRKY34N | At4g26440 | ACCAPADDGYNWRKYGQKLVKGSEYPRSYKCTHPNCE<br>AKKKVERSREGHIIIEIYTGDHIHNSKP      |
| AtWRKY34C | At4g26440 | SDIDILDDGYRWRKYGQKVVKGNPNPRSYKCTANGCTV<br>TKHVERASDDFKSVLTTYIGKHTHVVP      |
| AtWRKY35  | At2g34830 | SGEVVPSDLWAWRKYGQKPIKGSPPYRCSSSKGCS<br>ARKQVERSRTDPNMLVITYTSEHNHPWP        |
| AtWRKY36  | At1g69810 | CEDPSINDGCQWRKYGQKTAKTNPLPRAYYRCSSMSSNCP<br>VRKQVQRCGEEETSAFMTTYEGNHDHPLP  |
| AtWRKY38  | At5g22570 | SPDPIYYDGYLWRKYGQKSIKSNHQRSYYRCSYNKDHN<br>CEARKHEQKIKDNPPVYRTTYFGHHTCKTE   |
| AtWRKY39  | At3g04670 | KIADIPPDEYSWRKYGQKPIKGSPPYRCSSVRCGCPA<br>RKHVERCIDETSMLIVTYEGEHNHSRI       |
| AtWRKY40  | At1g80840 | DTTLVVKDGQWRKYGQKVTRDNPSPRAYFKCACAPSC<br>SVKKKVQRSVEDQSVLVATYEGEHNHPMP     |
| AtWRKY41  | At4g11070 | GLEPHDDIFSWRKYGQKDILGAKFPRSYRCTFRNTQYC<br>WATKQVQRSDGDPTIFEVTYRGTHTCSSQ    |
| AtWRKY42  | At4g04450 | SEAPMLSDGCQWRKYGQKMAKGNPCPRAYYRCTMAVG<br>CPVRKQVQRCAEDRTILITTYEGNHNHPLP    |
| AtWRKY43  | At2g46130 | SDADILDDGYRWRKYGQKSVKNSLYPRSYRCTQHMCN<br>VKKQVQRLSKETSIVETTYEGIHNPCE       |
| AtWRKY44N | At2g37260 | TGDRSSVDGYNWRKYGQKQVKGSECPRSYKCTHPKCP<br>VKKKVERSVEGQVSEIVYQGEHNHNSKP      |
| AtWRKY44C | At2g37260 | VESDSLEDGFRWRKYGQKVVGNAYPYRCSANCR<br>ARKHVERASDDPRAFITTYEGKHNHLL           |
| AtWRKY45  | At3g01970 | SQVDILDDGYRWRKYGQKAVKNNPFRSYKCTEEGCR<br>VKKQVQRQWGDEGVVTTYQGVHTHAVD        |
| AtWRKY46  | At2g46400 | QENGSIIDGHCWRKYGQKEIHGSKNPRAYYRCTHRFTQD<br>CLAVKQVQKSDTDPFLFEVKYLGHNHTCNNI |
| AtWRKY47  | At4g01720 | SDATTVNDGCQWRKYGQKMAKGNPCPRAYYRCTMAVG<br>CPVRKQVQRCAEDTTILITTYEGNHNHPLP    |
| AtWRKY48  | At5g49520 | SDIDNLDDGYRWRKYGQKAVKNSPYRCSYRCTTVGCG<br>VKKRVERSDDPSIVMTTYEGQHTHPFP       |
| AtWRKY49  | At5g43290 | NSNGMCDGKYWRKYGQKSIKNSPNPRSYKCTNPICNA<br>KKQVERSIDESNTYIITYEGFHFHYTY       |
| AtWRKY50  | At5g26170 | SEVEVLDDGFKWRKYGKKMVKNSPHPRNYYKCSVDGCP<br>VKKRVERDRDDPSFVITTYEGSHNHSSM     |
| AtWRKY51  | At5g64810 | SKIDVMDDGFKWRKYGKKSVKNNINKRNYYKCSSEGCS<br>VKKRVERDGDAAAYVITTYEGVHNHESL     |
| AtWRKY52  | At5g45260 | IPAIDEGDLWWRKYGQKDILGSRFPRGYRCAKFTHG<br>CKATKQVQRSETDSNMLAITYLSEHNHPRP     |

|           |           |                                                                             |
|-----------|-----------|-----------------------------------------------------------------------------|
| AtWRKY53  | At4g23810 | GLEGPQDDVFSWRKYGQKDILGAKFPRSYYRCTHRSTQN<br>CWATKQVQRSDGDATVFEVTYRGHTHTCSQA  |
| AtWRKY54  | At2g40750 | VEAKSSEDRYAWRKYGQKEILNTTFPRSFRCTHKPTQGC<br>KATKQVQKQDQDSEMFQITYIGYHTCTAN    |
| AtWRKY55  | At2g40740 | NTDLPPDDNHTWRKYGQKEILGSRFPRAYRCTHQKLYN<br>CPAKKQVQRLNDDPFTFRVTYRGSHTCYN     |
| AtWRKY56  | At1g64000 | SDDDLDDGYRWRKYGQKSVKNNNAHPRSYYRCTYHTCN<br>VKKQVQRLAKDPNVVVTTYEGVHNHPCE      |
| AtWRKY57  | At1g69310 | SDVDNLEDGYRWRKYGQKAVKNSPFPRSYYRCTNSRCT<br>VKKRVERSSDDPSIVITTYEGQHCHQTI      |
| AtWRKY58N | At3g01080 | NVDKPADDGYNWRKYGQKPIKGCEYPRSYYKCTHVNCP<br>VKKKVERSSDGQITQIIYKGGQHDHERP      |
| AtWRKY58C | At3g01080 | SEVDLLDDGYRWRKYGQKVVKGNPHPRSYYKCTTPNCT<br>VRKHVERASTDAKAVITTYEGKHNHDVP      |
| AtWRKY59  | At2g21900 | DEKVALDDGYKWRKYGKKPITGSPFPRHYHKCSSPDCNV<br>KKKIERDTNPNPDYILTYYEGRHNHPSP     |
| AtWRKY60  | At2g25000 | DTSLTVKDGQWRKYGQKITRDNPSPRAYFRCSFSPSCLV<br>KKKVQRSAEDPSFLVATYEGTHNHTGP      |
| AtWRKY61  | At1g18860 | CETPTMNDGCQWRKYGQKIAKGNPCPRAYRCTIAASCP<br>VRKQVQRCSSEDMSILISTYEGTHNHPLP     |
| AtWRKY62  | At5g01900 | SSTPIYHDGFLWRKYGQKQIKESYQRSYYKCAAYTKDQN<br>CEAKKQVQKIQHNPPLYSTTYFGQHICQLHQA |
| AtWRKY63  | At1g66600 | SPNRLDDGFTWRKYGQKTIKTSLYQRCYRCAAYAKDQN<br>CYATKRVMIQDSPPVYRTTYLGQHTCKAF     |
| AtWRKY64  | At1g66560 | SPTPRPDDGFTWRKYGQKTIKTSFYQRCYRCTYAKDQN<br>CNARKRVQMIQDNPPVYRTTYLGKHVCKAV    |
| AtWRKY65  | At1g29280 | GDTTPSDSWAWRKYGQKPIKGSPPYRGRYRCSSTKGCP<br>ARKQVERSRDDPTMILITYTSEHNHPWP      |
| AtWRKY66  | At1g80590 | SPTPAHIDGFIWRKYGQKTIKTSFHRWYRCAAYAKDQN<br>CDATKRVMQIQDNPPVYRNTYVGGHACEAP    |
| AtWRKY67  | At1g66550 | SRTMCPNDGFTWRKYGQKTIKASAHKRCYRCTYAKDQ<br>NCNATKRVMQIKDNPPVYRTTYLGKHVCKAF    |
| AtWRKY68  | At3g62340 | SEVLHLDDGYKWRKYGQKPVKDSFPFRNYRCTTTWCD<br>VKKRVERSFSDPSSVITTYEGQHHPRP        |
| AtWRKY69  | At3g58710 | GEVYPPSDSWAWRKYGQKPIKGSPPYRGRYRCSSTKGCP<br>ARKQVERSRVDPSKLMITYACDHNHPFP     |
| AtWRKY70  | At3g56400 | IESTILEDASFWRKYGQKEILNAKFRSFRCTHKYTQGCK<br>ATKQVQKVELEPKMFSITYIGNHTCNTN     |
| AtWRKY71  | At1g29860 | SEIDHLEDGYRWRKYGQKAVKNSPYPRSYYRCTTQKCNV<br>KKRVERSFQDPSIVITTYEGKHNHPIP      |
| AtWRKY72  | At5g15130 | CDTPTMNDGCQWRKYGQKIAKGNPCPRAYRCTVAPGC<br>PVRKQVQRCADDMSILITTYEGTHSHSLP      |
| AtWRKY74  | At5g28650 | KIADIPPDEYSWRKYGQKPIKGSPPYRGRYRCSSTKGCP<br>RKHVERCVEETSMLIVTYEGEHNHSRI      |

|           |                |                                                                             |
|-----------|----------------|-----------------------------------------------------------------------------|
| AtWRKY75  | At5g13080      | SQVDILDDGYRWRKYGQKAVKNNKFPRSYYRCTYGGCN<br>VKKQVQRLTVDQEVVVTTYEGVHSHPIE      |
| BdWRKY1   | Bradi2g16150.1 | ISDGCQWRKYGQKMAKGNPCPRAYYRCTMAAGCPVRK<br>QVQRCAEDRTLITTYEGNHNHPL            |
| BdWRKY2   | Bradi2g05510.1 | MEDGFRWRKYGKKA VKSSPNLRNYRCSAPGCGVKKRV<br>ERDRHDPAYVITTYHGVHNHPT            |
| BdWRKY3   | Bradi2g62130.1 | ADDGYKWRKYGQKSIKNSPNPRSYYRCTNPRCNAKKQV<br>ERSTEEPDTLLVTYEGLHLHYT            |
| BdWRKY4   | Bradi2g11170.1 | ISDGCQWRKYGQKMAKGNPCPRAYYRCTMATGCPVRKQ<br>VQRCAEDKTVLITTYEGSHNHQL           |
| BdWRKY5   | Bradi2g08620.1 | IADGCQWRKYGQKMAKGNPCPRAYYRCTMATGCPVRK<br>QVQRCAEDRTLITTYEGTHNHPL            |
| BdWRKY6   | Bradi3g18580.1 | PGDEFSWRKYGQKPIKGSYPRGYKCSVKGCPARKHV<br>ERATDDPAMLVVTYEGDHRHGA              |
| BdWRKY7N  | Bradi4g01950.1 | LEDGYNWRKYGQKQVKGSEDPRSYYKCTHAGCSMKKK<br>VERSLADGRVTQIVYKGAHDHPK            |
| BdWRKY7C  | Bradi4g01950.1 | LDDGFRWRKYGQKVVKGNPNPRSYYKCTTPGCPVRKHV<br>ERASHDARAVITTYEGKHNHDV            |
| BdWRKY8   | Bradi2g53510.1 | NSDGYMWRKYGQKRIMKTRFPRCYRCSHHRERGC PAT<br>KQVQEQQHGDGADHPKTYLVIYVHEHTCRT    |
| BdWRKY9   | Bradi2g53500.1 | YKDGSRWRKYGQKNIRNRIFARYYKCMYSHERGCRAK<br>KQVQQQDNSSDHRPMFLITYVNEHTCQQ       |
| BdWRKY10  | Bradi4g44370.1 | HYDGHQWRKYGQKVINNAKHPRSYYRCTYQEQGCKAT<br>KTVQQKDDNGAGAVYEDDQVMFAVVYYGQHTCKP |
| BdWRKY11  | Bradi2g30695.1 | LDDGQAWRKYGQKYIHNSKHPRAYFRCTHKYDQQCAAQ<br>RQVQRCEDDDDDKDTRVITYIGVHTCRD      |
| BdWRKY12  | Bradi3g57710.1 | MNDGCQWRKYGQKVAKGNPCPRAYYRCTVAPGCPVRK<br>QVQRCEQEDMSILITTYEGTHNHPL          |
| BdWRKY13  | Bradi3g34567.1 | PSDLWAWRKYGQKPIKGSYPRGYRCSSSKGC PARKQV<br>ERSRTPDNMLVITYTSDHNHPW            |
| BdWRKY14  | Bradi4g30360.1 | VKDG YQWRKYGQKVTRDNPSRAYFRCAFAPSCPIKKKV<br>QRSAENSSVLEATYEGEHNHPQ           |
| BdWRKY15  | Bradi4g44350.1 | HYDGHQWRKYGQKNINGMQHSRSYYRCTYKERNCSATK<br>TVQE QDHRSSFSYGDETVKYTVVYYGHHTCNG |
| BdWRKY16  | Bradi2g45900.1 | LEDGYRWRKYGQKAVKNSPYPRSYYRCTTQKCVVKKRV<br>ERSFQDPAVVITTYEGKHTHPI            |
| BdWRKY17  | Bradi2g30800.1 | PDDGYTWRKYGQKDILGSRYPRSYYRCTHKNYYGCEAK<br>KKVQRLDEDPFTYEVTYCGNHSCLT         |
| BdWRKY18N | Bradi1g02327.1 | SYDGYNWRKYGQKQVKGSEFPRSYYKCTYPTCPVKKRV<br>ETTLDGQIAEIVYNGEHNHPK             |
| BdWRKY18C | Bradi1g02327.1 | SEDAFRWRKYGQKAVNGNLFPRSYYRCSTARCNARKFVE<br>RSSDNSLCILIA                     |
| BdWRKY19  | Bradi4g28280.1 | GDDGHSWRKYGQKEILGAKHPRGYRCTHRKTLGCAAT<br>KQVQRSEDEPTLFDVIYHGDHTCLL          |

|           |                |                                                                             |
|-----------|----------------|-----------------------------------------------------------------------------|
| BdWRKY20  | Bradi1g63220.1 | LVDGHVWRKYGQKEIQNSPHPRSYRCTHKSDQGCNAK<br>RQVQACEADPSKYAVTYGHEHTCSD          |
| BdWRKY21  | Bradi3g09810.1 | SSDVWAWRKYGQKPIKGSPPYRGGYRCSSSKGCPCARKQV<br>ERSRADPNTFILTFTGEHNHAA          |
| BdWRKY22  | Bradi1g48770.1 | PDDGFSWRKYGQKDILGAKFPRGYRCTYRTAQGCPATR<br>QVQRSADLAVFDVITYQGAHTCHQ          |
| BdWRKY23  | Bradi1g08106.1 | LEDGYRWRKYGQKAVKNSPFRSYRCTNSKCTVKKRV<br>ERSDDPSVVITTYEGQHCHHT               |
| BdWRKY24  | Bradi2g49020.1 | LDDGYRWRKYGQKAVKNSSNPRSYYRCTHPTCNMKKQV<br>QRLAKDTDIVVTTYEGTHNHPC            |
| BdWRKY25  | Bradi2g53520.1 | TEDGFAWRKYGQKDINGCRHPRLYYRCAYRGEVCVATR<br>RVQRSRDEPAAVAVAYYGEHTCGQ          |
| BdWRKY26  | Bradi4g19060.1 | LDDGYRWRKYGQKAVKNNNFRSYRCTHQGCNVKKQ<br>VQRLSRDEGVVVTTYEGTHTHPI              |
| BdWRKY27N | Bradi1g07970.1 | GKDGYNWRKYGQKQLKDAESPRSYYKCTREACPVKKIV<br>ERSFDGCIKEITYKGRHTHPR             |
| BdWRKY27C | Bradi1g07970.1 | LDDGYRWRKYGQKVVKGNPRPRSYYKCTAENCNVRKQI<br>ERASSNPSCVLTTYTGRHSHHP            |
| BdWRKY28  | Bradi1g17660.1 | PEDGQSWRKYGQKFIHKSTNPRSYYRCTHKHDQGCKATK<br>QVQKSESNPSEFVISYFGEHTCKD         |
| BdWRKY29  | Bradi4g44360.1 | HYDGHQWRKYGQKNINGMQHPRSYYRCTYKERSCSATK<br>TVQKQDHNGSSFSYGDEAVNYTVMYYGNHTCNG |
| BdWRKY30  | Bradi2g15360.1 | LDDGYRWRKYGQKAVKNSSYPRSYYRCTAARCGVKKQ<br>VERSQQDPATVITTYEGHQHPS             |
| BdWRKY31  | Bradi1g14300.1 | PPDEYSWRKYGQKPIKGSPPYRGGYKCSSVRGCPARKHV<br>ERCVDPPSMLIVTYEGEHNHTR           |
| BdWRKY32N | Bradi5g13090.1 | AEDGYSWRKYGQKQVKHSEYPRSYYKCTHQSCQVKKKV<br>ERSHEGHVTEIYKGTNHHPK              |
| BdWRKY32C | Bradi5g13090.1 | LDDGYRWRKYGQKVVKGNPNPRSYYKCTHPGCSVRKHV<br>ERASHDLKSVITTYEGKHNHEV            |
| BdWRKY33  | Bradi5g17395.1 | LDDGYKWRKYGQKVVKNSLHPRSYYRCTHSNCRVKKRV<br>ERLSEDCRMVITTYEGRHTHTP            |
| BdWRKY34  | Bradi5g04817.1 | PADDFSWRKYGQKPIKGSPPYRGGYKCSVTRGCPARKHV<br>ERDPSEPSMLIVTYEGDHRHAP           |
| BdWRKY35  | Bradi5g20700.1 | PADEFWSRKYGQKPIKGSPPYRGGYKCSVTRGCPARKHV<br>ERATDDPAMLVVITYEGEHRHSP          |
| BdWRKY36  | Bradi5g20290.1 | PSDLWAWRKYGQKPIKGSPPYRGGYRCSSSKGCSPARKQV<br>ERSRTPDNMLVITYTSEHNHPW          |
| BdWRKY37N | Bradi3g39340.1 | AEDGYNWRKYGQKQVKNSDHPRSYYKCSHPNCPVKKKV<br>ERCQDGHTEIVYKGSNHPL               |
| BdWRKY37C | Bradi3g39340.1 | LDDGYRWRKYGQKVVKGNPNPRSYYRCTHPGCSVRKHV<br>ERASNDPKSVITTYEGKHDHEV            |
| BdWRKY38N | Bradi3g19640.1 | VGDGFNWRKYGQKQVKSNSRSYYRCTNSSCLAKKKV<br>EHYPDGRVIEIYRGTHSHEP                |

|           |                |                                                                     |
|-----------|----------------|---------------------------------------------------------------------|
| BdWRKY38C | Bradi3g19640.1 | MSDGYRWRKYGQKIVKGNPNPRSYYRCTHDGCPVRKHV<br>EKAADDINMVVITYEGKHNHDQ    |
| BdWRKY39  | Bradi3g06070.1 | VKDGYQWRKYGQKVTKDNPCPRAYFRCSFAPACPVKKK<br>VQRSAEDRTVLVATYEGEHNHGQ   |
| BdWRKY40  | Bradi3g34850.1 | GEDGHSWRKYGQKDILGAKHPRGYRCTHRNSQGCAAT<br>KQVQRADHDPALFDVVYHGEHTCRA  |
| BdWRKY41  | Bradi3g50360.1 | LDDGYKWRKYGQKVVKNSLHPRS YFRCTQSNCRVKKRV<br>ERLSTDCRMVITTYEGRHTHSP   |
| BdWRKY42  | Bradi3g52420.1 | PSDLWAWRKYGQKPIKGS PYPRGYRCS SSKGCPARKQV<br>ERSRTDPNTLVITYTSEHNHPW  |
| BdWRKY43  | Bradi4g25717.1 | YDDGHQWRKYGEKLSNSNFPFYRCTYKNDMKCPAT<br>KQVQQKDTSDPPLFSVTYFNHHTCNT   |
| BdWRKY44  | Bradi2g22230.1 | ENDGFHWRKYGEKKILNAAFPRLYRCGYSDEHKCPAKK<br>YVQQQDNGDPPLFMVTLINDHTCDA |
| BdWRKY45N | Bradi2g53760.1 | SDDGYNWRKYGQKQVKGSENPRSYYKCTFPSCPTKKKV<br>ETSLEGQITEIVYKGTNHAK      |
| BdWRKY45C | Bradi2g53760.1 | LDDGYRWRKYGQKVVKGNPNPRSYYKCTTVGCPVRKHV<br>ERASQDLRAVITTYEGKHNHDV    |
| BdWRKY46N | Bradi2g22440.1 | SDDGYNWRKYGQKQMKGSENPRSYYKCSAPGCPTKKKV<br>EQAPDGHVTEIVYKGTNHHPK     |
| BdWRKY46C | Bradi2g22440.1 | LDDGYRWRKYGQKVVKGNPNPRSYYKCTMAGCPVRKH<br>VERASQDLRAVVITTYEGKHNHDV   |
| BdWRKY47N | Bradi2g00280.1 | LEDGYKWRKYGQKQVKGSENPRSYYKCTYSNCSMKKKV<br>ERSLADGRITQIVYKGAHHHPK    |
| BdWRKY47C | Bradi2g00280.1 | LDDGFRWRKYGQKVVKGNPNPRSYYKCTTVACPVKRHV<br>ERASHDNRAVITTYEGKHNHDV    |
| BdWRKY48  | Bradi2g05500.1 | MNDGCQWRKYGQKISKGNPCPRAYRCTVAPSCPVRKQ<br>VQRCADDMSILITTYEGAHTHPL    |
| BdWRKY49  | Bradi2g05234.1 | LDDGYKWRKYGQKVVKNTHHPRSYYRCTQDKCRVKKR<br>VERLAEDPRMVITTYEGRHVHSP    |
| BdWRKY50  | Bradi2g33540.1 | LEDGFKWRKYGKKA VKNSPNPRNYYRCSAERCGVKKRV<br>ERDRDDPRFVVTTYDGVHNHAT   |
| BdWRKY51  | Bradi2g15877.1 | LDDGLSWRKYGQKDILGAKYPRAYFRCTHRNTQGCQAT<br>KQVQRDAGDPLIFDVVYHGDHTCAQ |
| BdWRKY52  | * LOC100843345 | MDDGYRWRKYGKKMVKNSPNPRNYYRCSSEGCRVKKR<br>VERERDDARFVITTYHGVHDHPA    |
| BdWRKY53  | Bradi2g44090.1 | LEDGYRWRKYGQKAVKNSPYPRSYYRCTPKCGVKKRV<br>ERSYQDPSTVITTYEGQHTHHS     |
| BdWRKY54  | Bradi2g19070.1 | LDDGYRWRKYGQKAVKNSAFPRSYYRCTHHTCNVKKQV<br>QRLAKDTAVVVITTYEGVHNHPC   |
| BdWRKY55  | Bradi2g45480.1 | LEDRFSWRKYGQKDILGAKYPRAYFRCTHRHTQSCSASK<br>QVQRTDGDPLLFVVYHGNHTCAQ  |
| BdWRKY56  | Bradi2g18530.1 | LDDGYKWRKYGKKS VKNSPNPRNYYRCSSTEGCSVKKRV<br>ERDRDDPSYVVITTYEGTHSHVS |

|           |                |                                                                    |
|-----------|----------------|--------------------------------------------------------------------|
| BdWRKY57  | Bradi2g54720.1 | PTDGYKWRKYGQKSIKNNPHPRSYYKCTSSRCSAKKHVE<br>KSTHDPFMFTVTYEGLHLHGP   |
| BdWRKY58  | Bradi2g48090.1 | LDDGYKWRKYGKKSVKNSPNPRNYRCSTEGCNVKKRV<br>ERDRDDADYVLTMYEGIHNHAS    |
| BdWRKY59N | Bradi4g45290.1 | SYDGYNWRKYGQKQVKGSEFPRSYYKCTYPTCPVKKRV<br>ETTLDGQIAEIVYNGEHNHPK    |
| BdWRKY59C | Bradi4g45290.1 | SEDAFRWRKYGQKAVNGNLFPRSYYRCSTARCNARKFVE<br>RSSDNSLVTTYEGRHNHIA     |
| BdWRKY60N | Bradi4g33370.1 | DEDDYNWKKYGPQVVKSTYPRSYFKCTHPNCPVKKKV<br>ERSQVGGQITEIYKGTNHPL      |
| BdWRKY60C | Bradi4g33370.1 | LDDGYRWRKYGQKVVKGPNPRSYKCTHPGCSVRKHV<br>ERASHDLKSVITTYEGKHNEV      |
| BdWRKY61N | Bradi4g06690.1 | ADDGYNWRKYGQKVVKGSDCPRSYYKCTHPSCPVKKKV<br>EHAEDGQISEIYKGGKHNHQR    |
| BdWRKY61C | Bradi4g06690.1 | LDDGYRWRKYGQKVVKGPNPHPRSYYKCTFAGCNVRKHI<br>ERASSDPKAVITTYEGKHNEP   |
| BdWRKY62N | Bradi4g09890.1 | TDDGYNWRKYGQTQVKGSENPRSYYKCAFSPCAKKKV<br>ERSLDNQIIEILYKGRHNHPK     |
| BdWRKY62C | Bradi4g09890.1 | ADDGYNWRKYGQTQVKGSENLSRYYKCTFPNCSTKKKV<br>ERSLANHIIIEILYKGRHNHPK   |
| BdWRKY63  | Bradi4g02680.1 | PPDEYSWRKYGQKPIKGSPPHPRGYKCSSVRGCPARKHV<br>ERCVDPEAMLAVTYEGEHNHNR  |
| BdWRKY64N | Bradi1g23340.1 | AEDGYNWRKYGQKHVKGSENPRSYYKCTHPNCEVKKLL<br>ERAADGQITEVVYKGRHNHPK    |
| BdWRKY64C | Bradi1g23340.1 | LDDGYRWRKYGQKVVKGPNPRSYKCTSTGCPVRKHV<br>ERASHDPKSVITTYEGKHNEV      |
| BdWRKY65N | Bradi1g47690.1 | SYDGYNWRKYGQKQVKGSEFPRSYYKCTYPTCPVKKRV<br>ETTLDGQIAEIVYNGEHNHPK    |
| BdWRKY65C | Bradi1g47690.1 | SEDAFRWRKYGQKAVNGNLFPIYGKSRLNVHMKKCMQE<br>LLCGCSGKPIKDNSRSTRCGCAA  |
| BdWRKY66N | Bradi1g16120.1 | ADDGYNWRKYGQKAVKGGYPRSYKCTQAGCPVKKK<br>VERSACGEITQIIRGQHNHQR       |
| BdWRKY66C | Bradi1g16120.1 | LDDGYRWRKYGQKVVKGPNPHPRSYYKCTFQGCDVKKHI<br>ERCSQDSTDVITTYEGKSHDV   |
| BdWRKY67N | Bradi1g22680.1 | ADDGYNWRKYGQKAVKGGYPRSYKCTLNCPVRKNV<br>EHSEDGKIIKIIYRGQHSHER       |
| BdWRKY67C | Bradi1g22680.1 | LDDGYRWRKYGQKVVVRGNPHPRSYYKCTYQGCDVKKHI<br>ERSSQEPHAVITTYEGKHVHDV  |
| BdWRKY68  | Bradi1g30870.1 | VKDGYQWRKYGQKVTKDNPCPRAYFRCSFAPACPVKKK<br>VQRSADDKALLVATYEGDHNHAQ  |
| BdWRKY69  | * LOC100834454 | EADPWAWRKYGQKTVKGSPTYRSYYRCSTAKECGARKI<br>MELCPTDPDTLILTYTGADHNHPP |
| BdWRKY70  | Bradi1g51030.1 | MNDGCQWRKYGQKISKGNPCPRAYRCTVAAGCPVRKV<br>VQRCAEDMSILISTYEGRHNHPL   |

|          |                  |                                                                      |
|----------|------------------|----------------------------------------------------------------------|
| BdWRKY71 | Bradi1g59180.1   | LEDGYRWRKYGQKAVKNSPFPRSYYRCTNSKCTVKKRV<br>ERSNDPSIVITTYEGQHCHHT      |
| BdWRKY72 | Bradi1g13207.1   | PEDGYEWKKYGQKFIKNIQRIRSYFRCDKRCGAKKKVE<br>WQPGDPSLRVVYEGAHQHGS       |
| BdWRKY73 | *LOC100845846    | PSDLWAWRKYGQKPIKGSYPYRGGYYRCSKGCMARKQ<br>VERSRSDPNMLVITYTAEHNHPW     |
| BdWRKY74 | Bradi1g09170.1   | PGDEFWRKYGQKPIKGSPPHPRGYYKCSSVRGCPARKHV<br>ERCVDDPAMLIVTYEGDHNHNR    |
| BdWRKY75 | *LOC100837754    | PGDEFWRKYGQKRIKGFPHPRQQNRIMKKEKLNERISKL<br>AGGVAVIQAAVEEGNVVRGGCAL   |
| BdWRKY76 | Bradi2g16357.1   | LEDGYRWRKYGQKAVKNSPFPRSYYRCTAQKCPVKKRV<br>ERSFQDAAVVITTYEGKHTPI      |
| BdWRKY77 | Bradi2g49906.1   | PPDSWAWRKYGQKPIKGSYPYRGGYYRCSKGCPCPARKQV<br>ERSRTDPTVLLVTYSFDHNHPW   |
| BdWRKY78 | Bradi1g63910.1   | HNDGHQWRKYGEKKINNCNFPYRYYRCTYKDNMNCPAT<br>KQIQKQDHSDPPLYQVTYYNEHSCNS |
| BdWRKY79 | Bradi2g44270.1   | VEDGQSWRKYGQKDIQNSEHPKSYFRCTHKYDQKCAAL<br>RQVQRCDQDPESFVVITYIGQHTCQD |
| BdWRKY80 | Bradi2g48907.1   | PTDEWAWRKYGQKPIKGSPPFRAYRCSKGCPCPARKQ<br>VERSQADPAMVLVTYSYEHNHST     |
| BdWRKY81 | Bradi2g15405.1   | ADDLWAWRKYGQKPIKGSYPYRGGYYKCSLAKACAARKL<br>VERSPDKPEVLIVTYIADHCHAV   |
| BdWRKY82 | Bradi2g44035.1   | SSDLWAWRKYGQKPIKGSYPYRGGYYKCSMKGCMARKM<br>VERSPAKPGVLVITYMAEHCHPV    |
| BdWRKY83 | Bradi2g22240.1   | VEDGYIWRKYGQKEILNSSHPRLYFRCSYKHDSGCPATRQ<br>VQHSDDPSLVITYYFGHHTCCV   |
| BdWRKY84 | Bradi2g53480.1   | YHDGFQWRKYGQKMIRGNIFPRCYRCTYHQDHGCPAS<br>KHVEQNSSEDPPLFRVIYTNHTCSG   |
| BdWRKY85 | Bradi2g53495.1   | HFDGHLWRKYGQKNIKDSAFPRLYRCSYREDKRCLASK<br>LVQQENCDDPPLFKVITYTYEHSNT  |
| OsWRKY1  | LOC_Os10g42850.1 | PSDLWAWRKYGQKPIKGSYPYRGGYYRCSKGCPCPARKQV<br>ERSRADPTMLVVITYTSDHNHPW  |
| OsWRKY3  | LOC_Os03g55080.1 | LEDGYRWRKYGQKAVKNSPFPRSYYRCTNSKCTVKKRV<br>ERSDDPSVITTYEGQHCHHT       |
| OsWRKY4  | LOC_Os06g44010.1 | VKDGYQWRKYGQKVTKDNPCPRAYFRCSFAPACPVKKK<br>VQRSADDNTVLVATYEGEHNHAQ    |
| OsWRKY5  | LOC_Os06g05380.1 | MNDGCQWRKYGQKIAKGNPCPRAYRCTVAAGCPVRK<br>QVQRCADDMSILITTYEGTHNHPL     |
| OsWRKY6  | LOC_Os06g30860.1 | APDLWAWRKYGQKPIKGSYPYRGGYYRCSNKNCAARKQ<br>VERCRFDPSFLLTYTGAHSGHDV    |
| OsWRKY7  | LOC_Os11g02470.1 | HEDGFQWRKYGEKKIQGTHFTRSYFRCTYRDDRGQATK<br>QIQKDKNDPPMFQVTYSNEHTCTT   |
| OsWRKY8  | LOC_Os11g02480.1 | YDDGHQWRKYGEKKLSNSNFPFYRCTYKNDMKCPAT<br>KQVQQKDTNDPPLFSVTYFNHHTCNS   |

|           |                  |                                                                              |
|-----------|------------------|------------------------------------------------------------------------------|
| OsWRKY9   | LOC_Os11g02520.1 | HNDGHQWRKYGQKWISRAKHSRSYYRCANSKVQGCPAT<br>KTVQQMDSSNGTSLFNVDYYGQHTCRG        |
| OsWRKY10  | LOC_Os11g02530.1 | HYDGHQWRKYGQKHINNSKHPRSYRCTYRQEEKCKAT<br>KTVQQREDLHHANSYNGDHPIMYTVVYYGQHTCCK |
| OsWRKY11  | LOC_Os11g02540.1 | DFDGYQWRKYGQKQIEGALYPRSYRCTNSTNQGLAK<br>KTVQRNGGGGAAGYTVAYISEHTCKS           |
| OsWRKY12  | LOC_Os02g43560.1 | LDDGYKWRKYGQKVVKNSLHPRYICST*                                                 |
| OsWRKY13  | LOC_Os09g30400.1 | LDDGYRWRKYGQKVVKGNPNPRSYKCTHQGCSVRKH<br>VERASHDLKSVITTYEGKHNHEV              |
| OsWRKY14  | LOC_Os09g25070.1 | VKDGYQWRKYGQKVTRDNPYPRAYFRCAFAPSPVKKK<br>LQRCAEDRSMLVATYEGEHNHAL             |
| OsWRKY15  | LOC_Os08g09800.1 | EYDGYNWRICGQKVVGQGGCHQKFYYECSQANCGAEKSV<br>TRSADGQIKKTVCKGSHNHPL             |
| OsWRKY16  | LOC_Os08g09810.1 | EYDGYNWRMCGQKLVQGGCHQKFYYECSQANCGAEKS<br>VTRSADGQIKKTVCKGSHNHPR              |
| OsWRKY17  | LOC_Os02g53100.1 | MNDGCQWRKYGQKVAKGNPCPRAYRCTVAPGCPVRK<br>QVQRCELDMSILVTTYEGTHNHPL             |
| OsWRKY18  | LOC_Os02g08440.1 | VKDGYQWRKYGQKVTKDNPCPRAYFRCSFAPACPVKKK<br>VQRSAEDNTILVATYEGEHNHGQ            |
| OsWRKY19  | LOC_Os03g21710.1 | LEDGHVWRKYGQKDIQNSPYPRSYRCTHKLQDQCGAR<br>RQTQRCEADPSNYDITYYGEHTCRD           |
| OsWRKY20  | LOC_Os01g40260.1 | LDDGYRWRKYGKKMVKNPNPRNYRCSSEGCRVKKRV<br>ERARDDARFVVTTYDGVHNHPA               |
| OsWRKY22N | LOC_Os01g61080.1 | SDDGYNWRKYGQKQVKGSENPRSYKCTFPNCPTKKKV<br>ERSLDGQITEIVYKGTNHAK                |
| OsWRKY22C | LOC_Os01g61080.1 | LDDGYRWRKYGQKVVKGNPNPRSYKCTTAGCPVRKHV<br>ERASHDLRAVITTYEGKHNHDV              |
| OsWRKY23  | LOC_Os01g43550.1 | SSDLWAWRKYGQKPIKGSYPRGYKCSSMKGCMARKM<br>VERSPAKPMLVVTYMAEHCHPV               |
| OsWRKY24  | LOC_Os01g43650.1 | LEDGYRWRKYGQKAVKNSPYPRSYRCTTPKCGVKKRV<br>ERSYQDPSTVITTYEGQHTHHS              |
| OsWRKY25  | LOC_Os03g45450.1 | PEDGYEWKKYGQKFIKNIQKNRSYFRCDQRCGAKKKVE<br>WHPHPD                             |
| OsWRKY26  | LOC_Os01g09080.1 | MNDGCQWRKYGQKISKGNPCPRAYRCTVAPNCPVRKQ<br>VQRCADDMSILITTYEGTHSHPL             |
| OsWRKY27  | LOC_Os01g09100.1 | LDDGFKWRKYGKKAVKSSPNPRNYRCSAAGCGVKKRV<br>ERDGDPRYVVTTYDGVHNHAT               |
| OsWRKY28  | LOC_Os01g74140.1 | ADDGYKWRKYGQKSIKNSPNPRSYRCTNPRCNAKKQV<br>ERAVDEPDTLIVTYEGLHLYT               |
| OsWRKY30  | LOC_Os04g51560.1 | PPDEYSWRKYGQKPIKGSYPRGYKCSSTVRGCPARKHV<br>ERATDDPAMLVVTYEGEHRHTP             |
| OsWRKY31  | LOC_Os01g53260.1 | LDDGYRWRKYGQKAVKNSKHPRSYRCTHHTCNVKKQ<br>VQRLAKDTSIVVVTTYEGVHNHPC             |



|           |                  |                                                                      |
|-----------|------------------|----------------------------------------------------------------------|
| OsWRKY32  | LOC_Os01g40430.1 | VKDGQCWRKYGQKTAKGNPWPRGYRCTGAPGCPVKK<br>QVQRCNHDTSVLVTTYDGVHNHPI     |
| OsWRKY33  | LOC_Os01g53040.1 | PTDSWAWRKYGQKPIKGSFPFRAYYRCSSSKGCPCARKQV<br>ERSRNDPDTVIVTYSFEHNHSA   |
| OsWRKY34  | LOC_Os04g50920.1 | PSDLWAWRKYGQKPIKGSFYPRGYRCSSSKGCSPARKQV<br>ERSRTPDNMLVITYTSEHNHPW    |
| OsWRKY35  | LOC_Os01g47560.1 | LEDGYRWRKYGQKAVKNSPYPRSYRCTTQKCPVKKRV<br>ERSYQDPAVVITTYEGKHTHPI      |
| OsWRKY36  | LOC_Os01g51690.1 | LDDGYKWRKYGKKSVKNSPNPRNYRCSSTEGCNVKKRV<br>ERDKNDPRYVVTMYEGIHNVHC     |
| OsWRKY37N | LOC_Os04g39570.1 | AEDGYSWRKYGQKQVKHSEYPRSYKCTHASCAYKKKV<br>ERSHEGHVTEIYKGTNHHPK        |
| OsWRKY37C | LOC_Os04g39570.1 | LDDGYRWRKYGQKVVKGNPNPRSYKCTHPGCLVRKHV<br>ERASHDLKSVITTYEGKHNEV       |
| OsWRKY38  | LOC_Os01g60490.1 | YHDGYQWRKYGQKMIRGNSFPRCYRCTYHQDHGCPAS<br>KHVEQHNSDPPLFRVIYTNEHTCGT   |
| OsWRKY40  | LOC_Os01g60540.1 | YKDGQWRKYGQKNIQDSNYLRLYFKCTFSRERSCAAK<br>KQVQQRDAGEPPMFLVTYLNEHTCQQ  |
| OsWRKY41  | LOC_Os01g60600.1 | YDDGYQWRKYGQKINNTNFPRSYRCSYHRERRCPAQ<br>KHVQQRDGDVDPALHVVVYTHEHTC    |
| OsWRKY42  | LOC_Os04g21950.1 | PADDFSWRKYGQKPIKGSFPFRGYKCSLTLRGCPARKHV<br>ERDPTDPSMLIVTYEGEHRHSP    |
| OsWRKY43  | LOC_Os05g04640.1 | ISDGCQWRKYGQKMAKGNPCPRAYRCTMASQCPVRKQ<br>VQRCAEDKSILITTYEGTHNHPL     |
| OsWRKY44  | LOC_Os05g50610.1 | LEDGYRWRKYGQKAVKNSSYPSYRCTAPRCGVKKRVE<br>RSEQDPSMVITTYEGQHTHPS       |
| OsWRKY45  | LOC_Os05g14370.1 | HYDGHQWRKYGQKNINNSNHQRSYRCSYKHEQNCKAT<br>KTVQQLDSAGETIMYTVVYYGQHTCKT |
| OsWRKY46  | LOC_Os05g46020.1 | LDDGYKWRKYGKKSVKNSPNPRNYRCSSTEGCNVKKRV<br>ERDKDDPSYVVTTYEGTHNHVS     |
| OsWRKY47N | LOC_Os08g38990.1 | AEDGYNWRKYGQKQVKNSEHPRSYKCTFTNCAVKKVE<br>RSQDQGQITEIVYKGSNHPL        |
| OsWRKY47C | LOC_Os08g38990.1 | LDDGYRWRKYGQKVVKGNPNPRSYKCTHPGCSVRKHV<br>ERSSHDLKSVITTYEGKHNEV       |
| OsWRKY48N | LOC_Os08g17400.1 | VGDGFNWRKYGQKQVKSENSRSYRCTNSNCLAKKKV<br>EHCPDGRVVEIYRGTHNHEP         |
| OsWRKY48C | LOC_Os08g17400.1 | TSDGYRWRKYGQKIVKGNPNPRSYRCTHDGCPVRKHV<br>EKAPDDDNNIVVTYEGKHNDQ       |
| OsWRKY49  | LOC_Os07g02060.1 | LEDGYRWRKYGQKAVKNSPFPRSYRCTNSKCTVKKRV<br>ERSDDPSVITTYEGQSHHT         |
| OsWRKY50  | LOC_Os02g26430.1 | PADDYSWRKYGQKPIKGSFYPRGYKCSLTLRGCPARKHV<br>ERDPGEPAMLIVTYDGDHRHGE    |
| OsWRKY52N | LOC_Os05g03900.1 | PADSWRKYGQKPIKGSPPRYHHLALIPHTYTAPNVL<br>VISQSFACALILYITDNFTR         |

|           |                  |                                                                         |
|-----------|------------------|-------------------------------------------------------------------------|
| OsWRKY52C | LOC_Os05g03900.1 | DHAVSRGYKCSSYRGCPARKQVDKCRNDASLLIITYTSD<br>HNHDN                        |
| OsWRKY53  | LOC_Os08g29660.1 | ADDGHSWRKYGQKDILGAKHPRGYRCTRNTQGCTAT<br>KQVQRTDDASLFDVVYHGEHTCRP        |
| OsWRKY54  | LOC_Os02g16540.1 | SADVWAWRKYGQKPIKGSYPYRGYRCSSSKGCPARKQ<br>VERSRDPNTFILTYTGEHNHSA         |
| OsWRKY56  | LOC_Os08g13840.1 | PADEYSWRKYGQKPIKGSYPYRGYRCSTVKGCPARKHV<br>ERAADDPATLVVITYEGDHRHSP       |
| OsWRKY57  | LOC_Os02g47060.1 | PSDLWAWRKYGQKPIKGSYPYRGYRCSSSKGCSARKQV<br>ERSRTDPNMLVITYTSEHNHPW        |
| OsWRKY58  | LOC_Os09g25060.1 | VKDGYQWRKYGQKVTRDNPSRAYFRCAFAPSCPVKKK<br>VQRSAEDSLLVATYEGEHNHPH         |
| OsWRKY59N | LOC_Os07g39480.1 | AEDGYNWRKYGQKHVKGSENPRSYKCTHPNCDVKKLL<br>ERSLDGQITEVVYKGRHNHPK          |
| OsWRKY59C | LOC_Os07g39480.1 | LDDGYRWRKYGQKVVKGNPNPRSYKCTNTGCPVRKHV<br>ERASHDPKSVITTYEGKHNHEV         |
| OsWRKY60  | LOC_Os05g50700.1 | STDLWAWRKYGQKPIKGSYPYRGYKCSLAKMARKM<br>VERSPEKPGVLVITYIAEHCHAV          |
| OsWRKY61N | LOC_Os05g27730.1 | LEDGYNWRKYGQKQVKGSENPRSYKCTYNGCSMKKK<br>VERSLADGRITQIVYKGAHNHPK         |
| OsWRKY61C | LOC_Os05g27730.1 | LDDGFRWRKYGQKVVKGNPNPRSYKCTTVGCPVRKHV<br>ERASHDTRAVITTYEGKHNHDV         |
| OsWRKY62  | LOC_Os09g09630.1 | DYDGYEWRKYGQKSISKTKHSRSYYRCTNQGQGMAT<br>KTVQQIENDNSSNSVVKLYNVDYFGKHTCKF |
| OsWRKY63  | LOC_Os05g09020.1 | LDDGFKWRKYGKKAVKNSPNPRNYRCSTEGCNVKKRV<br>ERDREDHRYVITTYDGVHNHAS         |
| OsWRKY64  | LOC_Os06g06360.1 | PDDGFSWRKYGQKDILGAKFPRGYRCTYRNAQGCPATK<br>QVQRSDADLAVFDVTYQGAHTCHQ      |
| OsWRKY65  | LOC_Os10g18099.1 | HTDGHWRKYGEKKIKNSSFPRLYYRCSYRDDRNCMAT<br>KVVQQENDADPPLYRVTYIHPHTCNP     |
| OsWRKY66  | LOC_Os11g45850.1 | EDDGFSWRKYGQKVEGAMHPTTQSNYFRCAHKMTTGC<br>KARKKVQRTDGDPLMVDVVYKGVHSCAG   |
| OsWRKY67  | LOC_Os11g45920.1 | ADDGYSWRKYGQKNVLGFSYLRGYRCATKGCQASKQ<br>VQRHDDGLLFDVTYFGEHTCAD          |
| OsWRKY68  | LOC_Os01g60640.1 | TTDGFWRKYGQKEINGCKHPRLYYRCAFRGQGCCLATTR<br>VQQSQSQDDPAAAFVIAYYGEHTCGG   |
| OsWRKY69N | LOC_Os05g39720.1 | SDDGYNWRKYGQKQMKSENPRSYKCTFPGCPTKKKV<br>EQSPDGQVTEIVYKGAHSHPK           |
| OsWRKY69C | LOC_Os05g39720.1 | LDDGYRWRKYGQKVVKGNPNPRSYKCTTAGCPVRKHV<br>ERASNDLRAVITTYEGKHNHDV         |
| OsWRKY70  | LOC_Os05g25700.1 | PDDGYTWRKYGQKDILGSRYPYRCTHKNYYGCEAK<br>KKVQRLDDDPFTYEVTYCGNHTCLT        |
| OsWRKY71  | LOC_Os05g25770.1 | LDDGQAWRKYGQKEIQNSKHPKAYFRCTHKYDQLCTAQ<br>RQVQRCDDDPASYRVTYIGEHTCRD     |

|           |                  |                                                                              |
|-----------|------------------|------------------------------------------------------------------------------|
| OsWRKY72  | LOC_Os03g20550.1 | HNDGHQWRKYGEKKINNCNFPRIYYRCTYKDNMNCPAT<br>KQIQKDYSDPPLYSVTYYNEHTCNS          |
| OsWRKY73  | LOC_Os12g01180.1 | SYDGYSWRKYGQKQVKGSEFPRSYYKCTHTPCVVKRKE<br>MTPDGRIAEIVYNGEHNHPK               |
| OsWRKY74  | LOC_Os12g02470.1 | DFDGYQWRKYGQKQIEGAMYPRSYRCTNSTNQGLAK<br>KTVQRNGGGGAAGYTVAYISEHTCKS           |
| OsWRKY75  | LOC_Os12g02450.1 | HYDGHQWRKYGQKHINNSKHPRSYRCTYRQEEKCKAT<br>KTVQQREDLHHANSYNGDHPVMTVVVYGGQHTCCK |
| OsWRKY76  | LOC_Os12g02420.1 | YDDGHQWRKYGEKKLSNSNFPRIYYRCTYKNDMKCPAT<br>KQVQQKDTNDPPLFSVTYFNHHTCNS         |
| OsWRKY77  | LOC_Os12g02400.1 | HEDGYQWRKYGEKKIQGTHFRSYFRCTYRDDRGQAT<br>KQIQQEDKNDPPMFQVTYSNEHTCTT           |
| OsWRKY78  | LOC_Os11g29870.1 | LDDGYRWRKYGQKAVKNNKFPRIYYRCTHQCNCVKKQ<br>VQRLSRDETIVVVTYEGTHTHPI             |
| OsWRKY79  | LOC_Os07g48260.1 | LEDGRQWRKYGQKHIQDSPNNPRSYRCTHRPDQGCMA<br>TKQVQTSESNSSEFVISYYGEHTCSD          |
| OsWRKY81  | LOC_Os03g63810.1 | PSDLWAWRKYGQKPIKGSYPRGYRCSKSGCMARKQ<br>VERSRSDPNMLVITYAAEHNHPW               |
| OsWRKY83N | LOC_Os12g32250.1 | ADDGYNWRKYGQKVVKGSDCPRSYYKCTHPNCPVKKK<br>VEHAEDGQISEIYKKGKHNHQR              |
| OsWRKY83C | LOC_Os12g32250.1 | LDDGYRWRKYGQKVVKGNPHPRSYKCTYAGCNVRKHI<br>ERASSDPKAVITTYEGKHNHEP              |
| OsWRKY84  | LOC_Os01g54600.1 | PSDSWAWRKYGQKPIKGSYPRGYRCSKSGCPARKQV<br>ERSRADPTVLLVTYSFEHNHPW               |
| OsWRKY85  | LOC_Os05g49100.1 | LEDGYRWRKYGQKAVKNSPFPRIYYRCTTQKCPVKKRV<br>ERSYQDAAVVITTYEGKHTHPI             |
| OsWRKY86  | LOC_Os05g49210.1 | ISDGCQWRKYGQKMAKGNPCPRAYRCTMAAGCPVRK<br>QVQRCAEDRTLITTYEGNHNHPL              |
| OsWRKY87  | LOC_Os07g27670.1 | RDDSYPRKYGQKDILGARFARSYYRCAQMLGCTARKQ<br>VQQSDDPSRLEITYIGLHTCGG              |
| OsWRKY88  | LOC_Os01g18584.1 | ISDGCQWRKYGQKMAKGNPCPRAYRCTMAIGCPVRKQ<br>VQRCAEDKTVLITTYEGNHNHQL             |
| OsWRKY89  | LOC_Os12g40570.1 | PPDEYSWRKYGQKPIKGSPPRGYYKCSSVRGCPARKHV<br>ERCVDDPAMLIVTYEENAEAPS             |
| OsWRKY90  | LOC_Os01g08710.1 | LDDGYKWRKYGQKVVKNTQHPRSYRCTQDNCRVKKR<br>VERLAEDPRMVITTYEGRHVHSP              |
| OsWRKY93  | LOC_Os05g40080.1 | MDDKFLWRKYGQKEIKNSKHPRFYRCSYKDDHGCTAT<br>KQVQQSETADDDTASPVIITYFGEHTCRH       |
| OsWRKY94  | LOC_Os05g40070.1 | ENDGFHWRKYGEKNILNSEFRKLYYRCGYSDERKCAKQ<br>YVQQENNKHPPEFRVTLTNEHTCNT          |
| OsWRKY95  | LOC_Os05g40060.1 | SEDGFLWRKYGQKEIKNSKHPRLYYRCSYKDDHGCTATK<br>QVQQSEEDPSLYVITYFGDHTCSC          |
| OsWRKY96  | LOC_Os01g14440.1 | IADGCQWRKYGQKMAKGNPCPRAYRCTMATGCPVRK<br>QVQRCAEDRSILITTYEGTHNHPL             |

|            |                  |                                                                       |
|------------|------------------|-----------------------------------------------------------------------|
| OsWRKY97   | LOC_Os01g46800.1 | LDDGFSWRKYGQKDILGAKYPRAYFRCTHRHTQGCHAS<br>KQVQRADGDPLLFDVVYHGDHTCAH   |
| OsWRKY100  | LOC_Os09g16510.1 | VDDGHSWRKYGQKEILGAKHPRGYRCTHRHSQGC<br>KQVQRTDEDATVFDVIYHGEHTCVH       |
| OsWRKY101  | LOC_Os12g02440.1 | HNDGHQWRKYGQKWISRAKHSRSYYRCANSKVQGPCAT<br>KTVQQMDSSNGTSLFNVDYYGQHTCRG |
| OsWRKY102  | LOC_Os03g58420.1 | PSDNYSWRKYGQKPIKGSPPHPRGYRCSKDCPARKHV<br>ERCSDPAMLLVITYENEHNHAQ       |
| OsWRKY103N | LOC_Os07g40570.1 | TDDGYNWRKYGQKAVKGGYPKSYKCTHLNCLVRKN<br>VEHSADGRIVQIIRGQHTHER          |
| OsWRKY103C | LOC_Os07g40570.1 | LDDGYRWRKYGQKVVKGNPYPRSYKCTYLGC<br>VERSVEEPNAVITTYEGKHIHDV            |
| OsWRKY105  | LOC_Os01g60520.1 | HFDGHLWRKYGQKNIKDSAFPRLYYRCSYREDRQCLASK<br>LVQQENDDPPLYRVITYEHTCNT    |
| OsWRKY107N | LOC_Os03g33012.1 | ADDGYNWRKYGQKAVKGGYPRSYKCTHLSCP<br>VERSSDGQITQILYRGQHNHQR             |
| OsWRKY107C | LOC_Os03g33012.1 | LDDGYRWRKYGQKVVKGNPHPRSYKCTYQGC<br>ERSSQDPKAVITTYEGKSHSDV             |
| OsWRKY108  | LOC_Os01g62514.1 | PADGYKWRKYGQKSIKNNPHPRCATRSIIDPI*                                     |
| OsWRKY109  | LOC_Os03g53050.1 | PADEFSWRKYGQKPIKGSPPHPRGYKCSSVRGCPARKHV<br>ERCVDSPMLIVTYEGDHNHNR      |
| OsWRKY110  | LOC_Os05g49620.1 | LDDGLSWRKYGQKDILGAKYPRAYFRCTHRHTQGCNAT<br>KQVQRADGDPLLFDVVYLGHTCGQ    |
| OsWRKY111  | LOC_Os04g46060.1 | LDDGYKWRKYGQKVVKNSLHPRSYRCTHNNCRVKKR<br>VERLSEDCRMVITTYEGRHTHTP       |
| OsWRKY112  | LOC_Os05g45230.1 | LDDGYRWRKYGQKAVKNSDFPSDELLELFSVDVNTQTA<br>TENL                        |
| OsWRKY113  | LOC_Os08g09840.1 | DDDGYYWRMTGQSTTQGESSPTILSHYQCAQANCVVQK<br>TVAYTADVETFYRGRHNHLR        |
| OsWRKY115  | LOC_Os08g09900.1 | ADDGFHWRMCGQSTIQGGLCPTVFSYQCALPNCGVRKSI<br>TRSADGQTIETVCKGCHNHPR      |
| OsWRKY119  | LOC_Os01g62510.1 | EDDGLALMTGANQSLWSYKCTSSRCSAKKHVEKSTDDP<br>EMLIVTYEGSHHHGP             |
| OsWRKY120N | LOC_Os03g55164.1 | AKDGYNWRKYGQKQLKDAESPRSYKCTRDGCPVKKIV<br>ERSSDGCIKEITYKGRHSHPR        |
| OsWRKY120C | LOC_Os03g55164.1 | LDDGYRWRKYGQKVVKGNPRPRSYKCTADGCNVRKQI<br>ERASADPKCVLTTYTGRHNHDP       |

\* GeneBank Locus ID

**Supplementary table 4A. Expression data of the BdWRKY family genes after biotic stress treatment.**

| gene name | F0968-4h    |         |            | Guy11-4h    |         |            | PH14-4h     |         |            | F0968-12h   |         |            | Guy11-12h   |         |            | PH14-12h    |         |            |
|-----------|-------------|---------|------------|-------------|---------|------------|-------------|---------|------------|-------------|---------|------------|-------------|---------|------------|-------------|---------|------------|
|           | fold-change | p-value | regulation | fold-change | p-value | regulation | fold-change | p-value | regulation | fold-change | p-value | regulation | fold-change | p-value | regulation | fold-change | p-value | regulation |
| BdWRKY1   | 0.2831      | 0.0014  | down       | 563.9       | 1E-05   | up         | 148.44      | 3E-05   | up         | 264.52      | 6E-05   | up         | 0.2368      | 0.0034  | down       | 200.89      | 0.0008  | up         |
| BdWRKY2   | 0.842       | 0.0059  |            | 2.0458      | 6E-06   | up         | 1.0607      | 0.1618  |            | 0.7602      | 9E-05   |            | 2.3793      | 0.0003  | up         | 1.8278      | 0.002   | up         |
| BdWRKY3   | 0.545       | 0.0098  | down       | 0.3352      | 5E-05   | down       | 4.7204      | 0.0179  | up         | 1.5179      | 0.0127  | up         | 15.526      | 4E-06   | up         | 0.3366      | 0.0048  | down       |
| BdWRKY4   | 0.7658      | 0.1127  |            | 1.0578      | 0.9703  |            | 1.2865      | 0.5265  |            | 1.171       | 0.6015  |            | 1.1569      | 0.1135  |            | 0.7142      | 0.1267  |            |
| BdWRKY5   | 0.5492      | 0.0087  | down       | 0.8406      | 0.2389  |            | 1.1512      | 0.9768  |            | 0.8717      | 0.2926  |            | 1.2706      | 0.0381  |            | 1.3583      | 0.1282  |            |
| BdWRKY6   | 1.0257      | 0.8267  |            | 2.0885      | 0.0028  | up         | 1.5089      | 0.0332  | up         | 0.4782      | 0.002   | down       | 1.487       | 0.111   |            | 0.7727      | 0.0416  |            |
| BdWRKY7   | 1.0906      | 0.3709  |            | 1.3242      | 0.0621  |            | 2.6972      | 3E-05   | up         | 1.8332      | 0.0004  | up         | 3.1421      | 4E-06   | up         | 2.0431      | 0.0006  | up         |
| BdWRKY8   | 0.5673      | 0.6222  |            | 0.8329      | 0.6188  |            | 0.3943      | 0.5129  |            | 0.596       | 0.744   |            | 0.1922      | 0.0563  | down       | 2.1374      | 0.0109  | up         |
| BdWRKY9   | 0.4423      | 0.0049  | down       | 0.6671      | 0.1412  |            | 5.5165      | 0.0147  | up         | 299.53      | 0.0001  | up         | 1.8788      | 0.0389  | up         | 2.6482      | 0.0316  | up         |
| BdWRKY10  | 0.0009      | 4E-05   | down       | 0.203       | 0.0176  | down       | 0.3042      | 0.0031  | down       | 0.1112      | 0.0035  | down       | 0.0095      | 9E-06   | down       | 0.7645      | 0.1344  |            |
| BdWRKY11  | 0.3942      | 4E-07   | down       | 0.367       | 5E-07   | down       | 0.9351      | 0.0017  |            | 0.4788      | 9E-08   | down       | 1.3458      | 0.0012  |            | 0.7627      | 4E-05   |            |
| BdWRKY12  | 2.2709      | 0.0219  | up         | 0.3103      | 0.0576  |            | 0.0163      | 0.0007  | down       | 1.6201      | 0.0449  | up         | 0.0624      | 0.0088  | down       | 2.9578      | 0.0227  | up         |
| BdWRKY13  | 0.2843      | 0.0045  | down       | 0.2064      | 0.0036  | down       | 0.3803      | 0.0116  | down       | 0.27        | 0.0067  | down       | 0.762       | 0.1318  |            | 0.3694      | 0.0112  | down       |
| BdWRKY14  | 0.6393      | 0.0099  | down       | 0.9657      | 0.0601  |            | 2.0369      | 0.0261  | up         | 0.9238      | 0.047   |            | 1.9136      | 0.0081  | up         | 1.7148      | 0.0441  | up         |
| BdWRKY15  | 0.7413      | 0.6521  |            | 0.2235      | 0.0041  | down       | 0.2851      | 0.0011  | down       | 0.2376      | 0.0017  | down       | 0.684       | 0.0281  |            | 0.3         | 0.0015  | down       |
| BdWRKY16  | 4.4115      | 1E-06   | up         | 1.2832      | 0.0107  |            | 1.2916      | 0.0208  |            | 1.6265      | 0.0023  | up         | 4.3642      | 0.0013  | up         | 4.5439      | 0.0009  | up         |
| BdWRKY17  | 0.4545      | 0.0075  | down       | 0.6935      | 0.1706  |            | 0.982       | 0.1879  |            | 0.3384      | 0.0022  | down       | 1.1476      | 0.8818  |            | 0.9161      | 0.3297  |            |
| BdWRKY18  | 70.825      | 1E-06   | up         | 136.16      | 2E-07   | up         | 24.844      | 3E-05   | up         | 8.2594      | 5E-06   | up         | 456.64      | 7E-07   | up         | 393.61      | 2E-06   | up         |
| BdWRKY19  | 0.5226      | 0.0011  | down       | 0.7115      | 0.008   |            | 0.5691      | 0.0009  | down       | 0.192       | 0.0021  | down       | 0.7111      | 0.0125  |            | 0.6772      | 0.0058  |            |
| BdWRKY20  | 0.6974      | 0.0134  |            | 1.231       | 0.1379  |            | 3.1621      | 0.0006  | up         | 1.3975      | 0.0706  |            | 2.2055      | 0.0021  | up         | 1.9483      | 0.0019  | up         |
| BdWRKY21  | 1.7061      | 0.0013  | up         | 1.6707      | 0.001   | up         | 2.9125      | 0.0001  | up         | 1.0018      | 0.4061  |            | 2.3764      | 0.0004  | up         | 2.9009      | 7E-05   | up         |
| BdWRKY22  | 0.1581      | 0.0011  | down       | 0.1296      | 3E-05   | down       | 0.6671      | 0.0245  |            | 0.1516      | 5E-06   | down       | 1.2385      | 0.8391  |            | 0.3466      | 0.0177  | down       |
| BdWRKY23  | 0.025       | 1E-05   | down       | 0.0181      | 1E-05   | down       | 0.0371      | 1E-05   | down       | 0.0231      | 0.0011  | down       | 0.0638      | 0.3802  |            | 0.0366      | 0.0685  |            |
| BdWRKY24  | 0.2721      | 0.0005  | down       | 0.3279      | 0.0005  | down       | 1.0668      | 0.6862  |            | 0.5382      | 0.0216  | down       | 1.3779      | 0.334   |            | 0.5331      | 0.0192  | down       |
| BdWRKY25  | 3.2928      | 0.0039  | up         | 0.162       | 0.091   | down       | 1.3441      | 0.7595  |            | 1.6011      | 0.0091  | up         | 2.0996      | 0.0308  | up         | 4.5041      | 0.0005  | up         |
| BdWRKY26  | 0.5787      | 2E-05   | down       | 0.733       | 0.0062  |            | 1.4134      | 0.0033  |            | 0.6458      | 3E-06   | down       | 1.2394      | 0.3778  |            | 0.9497      | 0.0041  |            |

|          |        |        |      |        |        |      |        |        |      |        |        |      |        |        |      |        |        |      |
|----------|--------|--------|------|--------|--------|------|--------|--------|------|--------|--------|------|--------|--------|------|--------|--------|------|
| BdWRKY27 | 0.6722 | 0.2146 |      | 0.0832 | 0.0014 | down | 0.1991 | 0.0071 | down | 0.1809 | 0.0153 | down | 0.2039 | 0.0044 | down | 0.1967 | 0.0196 | down |
| BdWRKY28 | 0.4803 | 3E-05  | down | 0.275  | 3E-06  | down | 0.4748 | 0.0003 | down | 0.1583 | 1E-06  | down | 0.671  | 0.0107 |      | 0.447  | 0.0042 | down |
| BdWRKY29 | 0.8177 | 0.7122 |      | 0.2644 | 0.1634 |      | 0.3593 | 2E-05  | down | 3.233  | 0.0018 | up   | 1.599  | 0.022  | up   | 0.2078 | 0.0259 | down |
| BdWRKY30 | 8.6772 | 0.0003 | up   | 9.7718 | 0.0003 | up   | 11.323 | 0.0002 | up   | 9.1166 | 0.0003 | up   | 11.055 | 0.0002 | up   | 14.554 | 0.0001 | up   |
| BdWRKY31 | 0.3532 | 0.0013 | down | 0.3363 | 0.0002 | down | 0.5304 | 0.0001 | down | 0.4367 | 0.0007 | down | 0.8136 | 0.0062 |      | 0.4031 | 6E-05  | down |
| BdWRKY32 | 0.4337 | 0.1041 |      | 0.1233 | 0.006  | down | 0.8115 | 0.2364 |      | 0.3057 | 0.0107 | down | 0.1783 | 0.0105 | down | 0.236  | 0.0203 | down |
| BdWRKY33 | 0.517  | 0.0034 | down | 0.4475 | 0.0003 | down | 0.7648 | 0.0056 |      | 0.5546 | 0.0008 | down | 1.2115 | 0.9015 |      | 0.5664 | 0.0011 | down |
| BdWRKY34 | 0.66   | 0.3269 |      | 0.2725 | 0.0004 | down | 0.371  | 0.0004 | down | 0.2933 | 0.0002 | down | 1.5186 | 0.0204 | up   | 0.7985 | 0.4995 |      |
| BdWRKY35 | 1.1683 | 0.1463 |      | 1.9512 | 0.0009 | up   | 1.9062 | 0.0024 | up   | 1.1373 | 0.5073 |      | 1.6072 | 0.0236 | up   | 0.7976 | 0.0111 |      |
| BdWRKY36 | 0.3123 | 3E-06  | down | 0.1425 | 4E-05  | down | 0.1306 | 3E-05  | down | 0.3151 | 2E-05  | down | 0.1737 | 5E-05  | down | 0.1588 | 0.0005 | down |
| BdWRKY37 | 1.9913 | 0.0043 | up   | 0.4725 | 0.0302 | down | 2.063  | 0.0107 | up   | 1.0062 | 0.1032 |      | 2.3281 | 0.0318 | up   | 4.2749 | 0.005  | up   |
| BdWRKY38 | 0.4636 | 1E-05  | down | 0.451  | 0.0001 | down | 0.741  | 4E-05  |      | 0.7898 | 0.1222 |      | 0.9675 | 0.0352 |      | 0.4658 | 1E-06  | down |
| BdWRKY39 | 1.2477 | 0.2543 |      | 2.3117 | 0.0032 | up   | 2.7271 | 0.0026 | up   | 2.364  | 0.0022 | up   | 2.4455 | 0.0036 | up   | 2.2849 | 0.0026 | up   |
| BdWRKY40 | 0.4437 | 0.0137 | down | 1.6938 | 0.0246 | up   | 2.4837 | 0.0033 | up   | 0.5068 | 0.0157 | down | 2.1126 | 0.0084 | up   | 0.9804 | 0.5867 |      |
| BdWRKY41 | 0.2012 | 1E-05  | down | 0.13   | 0.001  | down | 0.3652 | 0.0002 | down | 0.2587 | 1E-05  | down | 1.4594 | 0.7136 |      | 0.2157 | 3E-06  | down |
| BdWRKY42 | 0.4945 | 0.0036 | down | 0.3284 | 0.0003 | down | 0.5898 | 0.0586 |      | 0.7886 | 0.0081 |      | 0.7231 | 0.2792 |      | 0.2385 | 0.0118 | down |
| BdWRKY43 | 0.4854 | 0.0016 | down | 0.5618 | 0.0003 | down | 1.0549 | 0.1788 |      | 0.6521 | 0.0008 | down | 0.928  | 0.0273 |      | 0.4793 | 0.0001 | down |
| BdWRKY44 | 0.595  | 0.0617 |      | 0.294  | 0.0035 | down | 0.5778 | 0.0477 | down | 0.6515 | 0.0812 |      | 0.733  | 0.3566 |      | 1.4539 | 0.2049 |      |
| BdWRKY45 | 0.6921 | 0.0608 |      | 1.3481 | 0.1635 |      | 2.6136 | 0.0128 | up   | 1.3279 | 0.1499 |      | 1.5491 | 0.0274 | up   | 1.5233 | 0.0463 | up   |
| BdWRKY46 | 0.4421 | 0.0797 |      | 0.8672 | 0.3143 |      | 2.6357 | 0.0029 | up   | 2.2446 | 0.0103 | up   | 4.0344 | 0.0199 | up   | 1.8242 | 0.4953 |      |
| BdWRKY47 | 0.1636 | 0.0008 | down | 0.6065 | 0.1158 |      | 0.6988 | 0.0389 |      | 0.1998 | 0.0035 | down | 0.6646 | 0.0605 |      | 0.2721 | 0.0013 | down |
| BdWRKY48 | 1.3058 | 0.0156 |      | 2.2323 | 7E-05  | up   | 2.3606 | 8E-05  | up   | 1.4503 | 0.0873 |      | 3.336  | 0.0002 | up   | 2.9649 | 2E-05  | up   |
| BdWRKY49 | 0.2281 | 0.0004 | down | 0.2052 | 0.0003 | down | 0.5096 | 0.0034 | down | 0.0042 | 0.0003 | down | 0.0073 | 0.0002 | down | 0.0091 | 1E-06  | down |
| BdWRKY50 | 0.3703 | 0.0001 | down | 0.4971 | 0.0001 | down | 1.617  | 0.0024 | up   | 0.7105 | 0.0006 |      | 1.472  | 0.0853 |      | 0.5186 | 0.0001 | down |
| BdWRKY51 | 0.2007 | 5E-07  | down | 0.1874 | 1E-07  | down | 0.6262 | 0.0002 | down | 0.2222 | 0.0002 | down | 0.4206 | 5E-06  | down | 0.2475 | 2E-07  | down |
| BdWRKY52 | 0.3859 | 0.0004 | down | 0.5121 | 2E-05  | down | 1.8413 | 1E-04  | up   | 0.57   | 0.0006 | down | 0.977  | 0.0341 |      | 0.7661 | 0.0116 |      |
| BdWRKY53 | 0.2396 | 0.0023 | down | 0.2134 | 0.0009 | down | 0.6547 | 0.0452 | down | 0.5772 | 0.0313 | down | 0.8579 | 0.1456 |      | 0.2286 | 0.0015 | down |
| BdWRKY54 | 0.271  | 0.0004 | down | 0.273  | 0.0007 | down | 0.4505 | 0.0017 | down | 0.4686 | 0.0136 | down | 0.8005 | 0.3277 |      | 0.2644 | 0.0028 | down |
| BdWRKY55 | 0.8062 | 0.8075 |      | 0.241  | 0.0027 | down | 0.4233 | 0.0138 | down | 0.5098 | 0.0163 | down | 0.748  | 0.336  |      | 0.1503 | 0.0009 | down |
| BdWRKY56 | 0.2004 | 6E-05  | down | 0.2973 | 7E-06  | down | 0.8384 | 0.0012 |      | 0.2877 | 5E-06  | down | 0.4376 | 9E-05  | down | 0.2816 | 7E-05  | down |
| BdWRKY57 | 0.8531 | 0.0035 |      | 1.2633 | 0.094  |      | 2.6027 | 0.0002 | up   | 1.2651 | 0.0075 |      | 2.1626 | 4E-05  | up   | 0.8872 | 0.032  |      |
| BdWRKY58 | 0.0644 | 5E-07  | down | 0.14   | 1E-06  | down | 0.2319 | 7E-06  | down | 0.1064 | 2E-06  | down | 0.129  | 5E-05  | down | 0.0607 | 0.0002 | down |

|          |        |        |      |        |        |      |        |        |      |        |        |      |        |        |      |        |        |      |
|----------|--------|--------|------|--------|--------|------|--------|--------|------|--------|--------|------|--------|--------|------|--------|--------|------|
| BdWRKY59 | 21.862 | 0.0023 | up   | 0.2362 | 0.1148 |      | 1.0315 | 0.4876 |      | 1090.6 | 0.0002 | up   | 2.3281 | 0.3904 | up   | 0.9899 | 0.2819 |      |
| BdWRKY60 | 0.6512 | 0.0008 | down | 0.6007 | 0.0003 | down | 1.4537 | 0.0256 |      | 1.041  | 0.8854 |      | 1.4117 | 0.0496 |      | 0.6084 | 0.0003 | down |
| BdWRKY61 | 0.5052 | 0.0007 | down | 0.3719 | 0.0001 | down | 1.2305 | 0.4893 |      | 0.9864 | 0.436  |      | 1.6326 | 0.012  | up   | 0.4573 | 0.0003 | down |
| BdWRKY62 | 0.2376 | 0.0028 | down | 0.2439 | 0.0003 | down | 0.3375 | 0.0011 | down | 0.2237 | 0.0028 | down | 0.3417 | 0.0013 | down | 0.294  | 0.0011 | down |
| BdWRKY63 | 0.5708 | 0.0004 | down | 0.6223 | 0.0025 | down | 1.2267 | 0.6532 |      | 1.4363 | 0.0093 |      | 1.6809 | 0.0065 | up   | 0.589  | 0.0006 | down |
| BdWRKY64 | 0.4999 | 0.0013 | down | 0.4809 | 0.001  | down | 0.768  | 0.0142 |      | 0.6631 | 0.0073 |      | 0.7413 | 0.0061 |      | 0.4122 | 0.0005 | down |
| BdWRKY65 | 0.9956 | 0.0585 |      | 495.12 | 2E-07  | up   | 0.5157 | 0.1398 |      | 1.0062 | 0.1856 |      | 2.3281 | 0.0006 | up   | 0.9899 | 0.4422 |      |
| BdWRKY66 | 0.3077 | 0.0002 | down | 0.1996 | 6E-06  | down | 0.3734 | 1E-05  | down | 0.4097 | 0.0054 | down | 0.6823 | 0.0014 |      | 0.3296 | 0.0012 | down |
| BdWRKY67 | 0.2334 | 3E-05  | down | 0.2439 | 2E-05  | down | 0.468  | 0.0025 | down | 0.3871 | 6E-05  | down | 0.4824 | 0.0002 | down | 0.3283 | 2E-05  | down |
| BdWRKY68 | 0.2645 | 0.007  | down | 0.6072 | 0.0019 | down | 1.0613 | 0.1135 |      | 0.2358 | 0.0053 | down | 0.6283 | 0.0025 | down | 0.3404 | 1E-05  | down |
| BdWRKY69 | 1841.8 | 1E-07  | up   | 0.426  | 0.0003 | down | 0.3132 | 0.0008 | down | 0.001  | 5E-07  | down | 0.2165 | 0.0013 | down | 0.0866 | 0.0004 | down |
| BdWRKY70 | 1.5116 | 0.0313 | up   | 0.3957 | 0.0032 | down | 0.6104 | 0.0541 |      | 0.9305 | 0.4859 |      | 0.3549 | 0.0015 | down | 0.4523 | 0.0277 | down |
| BdWRKY71 | 0.3486 | 0.0027 | down | 0.0925 | 0.0007 | down | 0.2305 | 0.0001 | down | 0.1866 | 5E-05  | down | 0.312  | 0.0003 | down | 0.1255 | 2E-05  | down |
| BdWRKY72 | 1.1998 | 0.0019 |      | 1.2357 | 0.005  |      | 2.516  | 9E-06  | up   | 1.2628 | 0.0119 |      | 1.6032 | 0.0038 | up   | 0.735  | 0.0035 |      |
| BdWRKY73 | 0.7206 | 0.0327 |      | 0.4469 | 8E-06  | down | 0.7178 | 0.0008 |      | 0.902  | 0.1252 |      | 1.0086 | 0.1008 |      | 0.5098 | 0.0045 | down |
| BdWRKY74 | 0.5224 | 0.0002 | down | 0.3757 | 0.0003 | down | 0.6137 | 0.0004 | down | 0.8546 | 0.0307 |      | 0.8098 | 0.0059 |      | 0.5083 | 0.0015 | down |
| BdWRKY75 | 0.0012 | 0.0002 | down | 0.0884 | 0.0026 | down | 0.0013 | 0.0003 | down | 0.0591 | 0.0903 | down | 0.0018 | 0.0001 | down | 0.0087 | 5E-05  | down |
| BdWRKY76 | 1.505  | 0.0243 | up   | 1.0965 | 0.8494 |      | 3.2495 | 0.0076 | up   | 1.9031 | 0.0481 | up   | 2.2638 | 0.0462 | up   | 1.9118 | 0.0419 | up   |
| BdWRKY77 | 0.9067 | 0.3785 |      | 0.9719 | 0.3075 |      | 2.4416 | 0.0004 | up   | 1.8354 | 0.0004 | up   | 1.7721 | 0.0004 | up   | 0.6361 | 0.0039 | down |
| BdWRKY78 | 0.9225 | 0.7303 |      | 0.8216 | 0.5079 |      | 1.7694 | 0.0269 | up   | 1.0325 | 0.9601 |      | 1.5119 | 0.0458 | up   | 1.0103 | 0.9128 |      |
| BdWRKY79 | 0.2713 | 2E-10  | down | 0.297  | 5E-09  | down | 0.764  | 0.001  |      | 0.3976 | 3E-06  | down | 0.765  | 7E-05  |      | 0.3832 | 2E-05  | down |
| BdWRKY80 | 1.8852 | 0.047  | up   | 1.3413 | 0.3472 |      | 2.6243 | 0.0124 | up   | 2.5175 | 0.0271 | up   | 1.783  | 0.0372 | up   | 2.1193 | 0.0254 | up   |
| BdWRKY81 | 784.23 | 3E-07  | up   | 1120.6 | 2E-08  | up   | 770.32 | 4E-09  | up   | 544.57 | 4E-07  | up   | 822.29 | 8E-09  | up   | 555.2  | 5E-09  | up   |
| BdWRKY82 | 2.6598 | 4E-06  | up   | 1.5374 | 0.0023 | up   | 4.5596 | 4E-07  | up   | 2.516  | 0.0048 | up   | 3.2525 | 1E-05  | up   | 1.7649 | 0.0004 | up   |
| BdWRKY83 | 0.7184 | 0.1445 |      | 0.6634 | 0.1003 |      | 1.1127 | 0.9027 |      | 0.8994 | 0.4973 |      | 1.0337 | 0.5551 |      | 1.1018 | 0.8486 |      |
| BdWRKY84 | 0.509  | 0.4538 |      | 0.4866 | 0.0144 | down | 1.3001 | 0.0001 |      | 0.0015 | 4E-07  | down | 0.0017 | 5E-07  | down | 0.9468 | 0.032  |      |
| BdWRKY85 | 0.4504 | 0.5957 |      | 0.4517 | 0.2631 |      | 0.3946 | 0.1427 |      | 0.8008 | 0.094  |      | 0.0237 | 1E-05  | down | 0.484  | 0.0025 | down |
| BdWRKY86 | 0.132  | 0.0001 | down | 0.1759 | 4E-06  | down | 0.2981 | 0.0004 | down | 0.1654 | 4E-09  | down | 0.2075 | 8E-05  | down | 0.4643 | 0.0003 | down |

**Supplementary table 4B. Expression data of the BdWRKY family genes after abiotic stress treatment.**

| gene name | Heat        |         |            | Clod        |         |            | NaCl        |         |            | PEG         |         |            | H <sub>2</sub> O <sub>2</sub> |         |            |
|-----------|-------------|---------|------------|-------------|---------|------------|-------------|---------|------------|-------------|---------|------------|-------------------------------|---------|------------|
|           | fold-change | p-value | regulation | fold-change | p-value | regulation | fold-change | p-value | regulation | fold-change | p-value | regulation | fold-change                   | p-value | regulation |
| BdWRKY1   | 2.0332      | 0.0003  | up         | 0.6301      | 0.0075  | down       | 0.3348      | 0.0001  | down       | 0.0843      | 1E-05   | down       | 0.0524                        | 0.001   | down       |
| BdWRKY2   | 0.8185      | 0.0276  |            | 1.5569      | 0.0345  | up         | 0.575       | 0.0004  | down       | 0.4831      | 0.0025  | down       | 0.3053                        | 1E-05   | down       |
| BdWRKY3   | 1.0155      | 0.315   |            | 2.278       | 0.0047  | up         | 0.7505      | 0.0067  |            | 0.4865      | 0.0014  | down       | 0.7198                        | 0.0146  |            |
| BdWRKY4   | 1.8394      | 9E-06   | up         | 3.1034      | 0.0032  | up         | 0.9006      | 0.2478  |            | 0.5833      | 1E-05   | down       | 0.5951                        | 3E-08   | down       |
| BdWRKY5   | 0.3969      | 0.0003  | down       | 1.0074      | 0.5268  |            | 0.3474      | 0.0002  | down       | 0.182       | 0.0002  | down       | 0.0671                        | 3E-05   | down       |
| BdWRKY6   | 2.2214      | 0.0003  | up         | 4.6697      | 0.0002  | up         | 0.9395      | 0.0025  |            | 0.4525      | 0.0016  | down       | 0.5322                        | 3E-06   | down       |
| BdWRKY7   | 0.1634      | 8E-05   | down       | 0.6064      | 0.0053  | down       | 0.1787      | 1E-05   | down       | 0.1169      | 8E-07   | down       | 0.0385                        | 5E-06   | down       |
| BdWRKY8   | 1.9992      | 7E-07   | up         | 3.023       | 7E-05   | up         | 0.6601      | 9E-05   |            | 0.678       | 0.0308  |            | 0.5619                        | 1E-05   | down       |
| BdWRKY9   | 1.2538      | 3E-08   |            | 1.1936      | 0.0844  |            | 0.5475      | 0.0003  | down       | 0.2127      | 1E-04   | down       | 0.0887                        | 2E-06   | down       |
| BdWRKY10  | 6.1969      | 5E-05   | up         | 6.5189      | 8E-06   | up         | 2.1608      | 4E-07   | up         | 1.1189      | 0.0733  |            | 2.3738                        | 9E-05   | up         |
| BdWRKY11  | 1.2483      | 0.0253  |            | 2.3951      | 0.0002  | up         | 0.379       | 6E-05   | down       | 0.2932      | 9E-05   | down       | 0.6012                        | 0.0011  | down       |
| BdWRKY12  | 2.2585      | 0.018   | up         | 3.16        | 0.0001  | up         | 0.62        | 8E-05   | down       | 0.3552      | 2E-05   | down       | 0.3752                        | 0.0002  | down       |
| BdWRKY13  | 1.5089      | 0.0193  | up         | 3.309       | 0.0004  | up         | 0.9445      | 0.2628  |            | 0.3592      | 0.0073  | down       | 0.882                         | 0.3633  |            |
| BdWRKY14  | 0.4528      | 0.0006  | down       | 1.2469      | 0.2144  |            | 0.1846      | 6E-05   | down       | 0.3661      | 0.0001  | down       | 0.46                          | 0.0002  | down       |
| BdWRKY15  | 4.0475      | 0.0004  | up         | 2.6192      | 0.0003  | up         | 3.6067      | 0.0003  | up         | 0.6429      | 0.0564  |            | 1.0633                        | 0.6709  |            |
| BdWRKY16  | 1.8376      | 0.0045  | up         | 4.5349      | 0.0002  | up         | 1.0722      | 0.6637  |            | 0.5148      | 0.0053  | down       | 0.6125                        | 0.0012  | down       |
| BdWRKY17  | 2.8224      | 4E-05   | up         | 4.9836      | 0.0008  | up         | 1.4511      | 0.0145  |            | 1.406       | 0.0358  |            | 0.9651                        | 0.7304  |            |
| BdWRKY18  | 1.6369      | 0.0375  | up         | 2.3963      | 0.0253  | up         | 0.6868      | 0.1113  |            | 0.5949      | 0.1173  |            | 0.7096                        | 0.1949  |            |
| BdWRKY19  | 0.0646      | 3E-05   | down       | 0.7671      | 0.1099  |            | 0.0786      | 8E-06   | down       | 0.0359      | 2E-06   | down       | 0.0539                        | 2E-06   | down       |
| BdWRKY20  | 0.4325      | 0.002   | down       | 1.5633      | 0.0376  | up         | 0.2031      | 8E-09   | down       | 0.3455      | 5E-05   | down       | 0.2212                        | 1E-06   | down       |
| BdWRKY21  | 0.9737      | 0.2817  |            | 0.9606      | 0.4722  |            | 0.8939      | 0.0122  |            | 0.2908      | 7E-05   | down       | 0.8054                        | 0.0025  |            |
| BdWRKY22  | 0.7586      | 0.1852  |            | 0.7347      | 0.1485  |            | 0.5191      | 0.0029  | down       | 0.071       | 8E-05   | down       | 0.3549                        | 0.0002  | down       |
| BdWRKY23  | 1.5045      | 0.0089  | up         | 1.1262      | 0.5027  |            | 0.2903      | 0.0002  | down       | 0.2107      | 2E-05   | down       | 0.3091                        | 9E-06   | down       |
| BdWRKY24  | 0.8016      | 0.0003  |            | 2.1525      | 0.0008  | up         | 0.474       | 0.0005  | down       | 0.4195      | 4E-05   | down       | 0.6224                        | 8E-10   | down       |
| BdWRKY25  | 92.043      | 3E-06   | up         | 2.8772      | 0.0064  | up         | 1.1423      | 0.2937  |            | 0.6861      | 0.5201  |            | 1.1374                        | 0.2088  |            |
| BdWRKY26  | 0.4109      | 2E-05   | down       | 0.7593      | 0.0018  |            | 0.6098      | 0.0001  | down       | 0.4107      | 0.0015  | down       | 0.7635                        | 0.0405  |            |



|          |        |        |      |        |        |      |        |        |      |        |        |      |        |        |      |
|----------|--------|--------|------|--------|--------|------|--------|--------|------|--------|--------|------|--------|--------|------|
| BdWRKY27 | 1.9238 | 4E-06  | up   | 1.5175 | 0.036  | up   | 0.7383 | 0.1751 |      | 0.1955 | 0.0072 | down | 0.3338 | 6E-06  | down |
| BdWRKY28 | 1.5085 | 0.0152 | up   | 0.9877 | 0.5193 |      | 0.5638 | 0.0068 | down | 0.51   | 0.0054 | down | 0.3315 | 0.0015 | down |
| BdWRKY29 | 7.4704 | 0.0007 | up   | 3.9061 | 0.0002 | up   | 0.8049 | 0.0092 |      | 0.4223 | 0.0169 | down | 0.9758 | 0.3477 |      |
| BdWRKY30 | 0.9141 | 0.1325 |      | 1.8983 | 0.0003 | up   | 0.7515 | 0.0002 |      | 0.4599 | 0.0002 | down | 0.5391 | 0.0005 | down |
| BdWRKY31 | 0.2015 | 2E-05  | down | 1.5474 | 0.0164 | up   | 0.2933 | 5E-07  | down | 0.1641 | 9E-06  | down | 0.3043 | 8E-07  | down |
| BdWRKY32 | 0.882  | 0.0301 |      | 2.7351 | 0.0021 | up   | 0.4032 | 4E-06  | down | 0.2231 | 0.0012 | down | 0.0279 | 0.0016 | down |
| BdWRKY33 | 4.979  | 0.0024 | up   | 4.873  | 0.0002 | up   | 1.2632 | 0.1115 |      | 0.289  | 0.0006 | down | 0.7569 | 0.1546 |      |
| BdWRKY34 | 0.7293 | 0.5731 |      | 1.2652 | 0.6999 |      | 0.3684 | 0.1472 | down | 0.1557 | 0.0255 | down | 0.2013 | 0.0366 | down |
| BdWRKY35 | 11.99  | 2E-05  | up   | 1.5137 | 0.0103 | up   | 0.4069 | 0.0014 | down | 0.3818 | 0.0159 | down | 0.8295 | 0.2502 |      |
| BdWRKY36 | 1.6352 | 0.0074 | up   | 2.5382 | 0.0003 | up   | 0.7332 | 0.0046 |      | 0.5565 | 0.0048 | down | 0.5281 | 0.0026 | down |
| BdWRKY37 | 7.9046 | 0.0021 | up   | 2.3244 | 0.0402 | up   | 2.0532 | 0.0207 | up   | 0.8045 | 0.2919 |      | 0.7173 | 0.1488 |      |
| BdWRKY38 | 0.9859 | 0.0242 |      | 2.975  | 4E-06  | up   | 0.4975 | 3E-05  | down | 0.2978 | 0.0001 | down | 0.4558 | 3E-06  | down |
| BdWRKY39 | 2.2962 | 0.0002 | up   | 1.7041 | 0.0013 | up   | 0.5523 | 0.0003 | down | 0.2839 | 1E-05  | down | 0.2487 | 0.0001 | down |
| BdWRKY40 | 1.5026 | 0.0459 | up   | 1.7819 | 0.0003 | up   | 0.5283 | 4E-05  | down | 0.2193 | 1E-05  | down | 0.259  | 7E-08  | down |
| BdWRKY41 | 1.7508 | 0.0042 | up   | 3.4814 | 0.0003 | up   | 0.3423 | 0.0011 | down | 0.205  | 0.0017 | down | 0.2935 | 0.0011 | down |
| BdWRKY42 | 1.7169 | 0.0367 | up   | 4.8904 | 0.002  | up   | 0.9905 | 0.9196 |      | 0.3662 | 0.0298 | down | 0.539  | 0.0603 | down |
| BdWRKY43 | 1.5157 | 0.0018 | up   | 1.6199 | 0.0021 | up   | 0.7257 | 0.083  |      | 0.5735 | 0.0103 | down | 0.8853 | 0.6317 |      |
| BdWRKY44 | 2.48   | 0.0046 | up   | 3.1177 | 0.0002 | up   | 0.8244 | 6E-06  |      | 0.4052 | 2E-05  | down | 0.4273 | 0.0009 | down |
| BdWRKY45 | 1.5485 | 0.0254 | up   | 2.0052 | 0.0146 | up   | 0.7922 | 0.0992 |      | 0.3895 | 0.0055 | down | 0.316  | 0.0012 | down |
| BdWRKY46 | 1.5027 | 0.0352 | up   | 0.9188 | 0.0178 |      | 0.9096 | 0.0543 |      | 0.2823 | 0.0002 | down | 0.2509 | 5E-05  | down |
| BdWRKY47 | 1.9172 | 0.0002 | up   | 2.1604 | 3E-05  | up   | 0.52   | 0.0007 | down | 0.4981 | 4E-05  | down | 0.3537 | 7E-06  | down |
| BdWRKY48 | 2.1485 | 0.0004 | up   | 3.098  | 0.0013 | up   | 0.8473 | 0.0223 |      | 0.6707 | 0.0026 |      | 0.4008 | 4E-05  | down |
| BdWRKY49 | 0.5966 | 0.0252 | down | 1.0239 | 0.343  |      | 0.8066 | 0.2966 |      | 0.4264 | 0.0002 | down | 0.2839 | 8E-05  | down |
| BdWRKY50 | 7.462  | 3E-05  | up   | 0.4396 | 0.0006 | down | 0.0893 | 4E-05  | down | 0.2189 | 0.0001 | down | 0.114  | 1E-05  | down |
| BdWRKY51 | 0.1614 | 1E-05  | down | 0.2651 | 4E-05  | down | 0.2638 | 0.0003 | down | 0.0825 | 9E-07  | down | 0.1451 | 2E-06  | down |
| BdWRKY52 | 0.13   | 3E-05  | down | 0.6014 | 0.0006 | down | 0.1052 | 2E-06  | down | 0.0824 | 5E-06  | down | 0.1772 | 5E-06  | down |
| BdWRKY53 | 0.7061 | 0.0338 |      | 1.858  | 0.0058 | up   | 0.9079 | 0.0101 |      | 0.3279 | 1E-06  | down | 0.5079 | 0.0002 | down |
| BdWRKY54 | 0.566  | 0.0121 | down | 1.6828 | 0.0189 | up   | 1.3363 | 0.1216 |      | 0.2481 | 0.0003 | down | 0.575  | 0.004  | down |
| BdWRKY55 | 4.4023 | 0.0007 | up   | 4.3448 | 6E-07  | up   | 1.4172 | 3E-05  |      | 0.706  | 0.0026 |      | 0.5701 | 0.0001 | down |
| BdWRKY56 | 2.7381 | 0.0004 | up   | 2.2497 | 0.0002 | up   | 0.5178 | 0.0003 | down | 0.3346 | 0.0003 | down | 0.7373 | 0.0019 |      |
| BdWRKY57 | 0.9771 | 0.3834 |      | 2.2919 | 0.0002 | up   | 0.5295 | 0.0019 | down | 0.1677 | 1E-04  | down | 0.3527 | 0.0003 | down |
| BdWRKY58 | 0.1483 | 8E-05  | down | 0.6552 | 0.0024 | down | 0.0745 | 9E-07  | down | 0.1098 | 9E-05  | down | 0.1418 | 3E-06  | down |

|          |        |        |      |        |        |      |        |        |      |        |        |      |        |        |      |
|----------|--------|--------|------|--------|--------|------|--------|--------|------|--------|--------|------|--------|--------|------|
| BdWRKY59 | 6.0223 | 0.0001 | up   | 9.014  | 2E-05  | up   | 2.6635 | 0.0002 | up   | 0.5709 | 0.0047 | down | 0.8628 | 0.4593 |      |
| BdWRKY60 | 0.2652 | 7E-05  | down | 1.809  | 0.0023 | up   | 0.4358 | 0.0004 | down | 0.2644 | 0.0003 | down | 0.2601 | 6E-05  | down |
| BdWRKY61 | 1.1699 | 0.3967 |      | 2.7997 | 0.0001 | up   | 0.5342 | 2E-05  | down | 0.3533 | 0.0002 | down | 0.436  | 7E-06  | down |
| BdWRKY62 | 0.4797 | 1E-06  | down | 1.2973 | 0.039  |      | 0.073  | 1E-06  | down | 0.3188 | 0.0002 | down | 0.1077 | 5E-07  | down |
| BdWRKY63 | 0.442  | 0.0006 | down | 3.0239 | 0.0162 | up   | 0.6056 | 9E-06  | down | 0.3568 | 2E-05  | down | 0.277  | 4E-06  | down |
| BdWRKY64 | 0.6951 | 5E-05  |      | 2.7119 | 3E-06  | up   | 0.4146 | 0.0002 | down | 0.3168 | 0.0588 |      | 0.243  | 0.9424 |      |
| BdWRKY65 | 3.8172 | 0.0055 | up   | 4.8832 | 0.0144 | up   | 3.2325 | 0.0112 | up   | 0.3737 | 0.045  | down | 1.2235 | 0.254  |      |
| BdWRKY66 | 4.3589 | 3E-05  | up   | 2.7828 | 3E-05  | up   | 0.5106 | 4E-05  | down | 0.2653 | 1E-05  | down | 0.3085 | 9E-06  | down |
| BdWRKY67 | 0.9954 | 0.5417 |      | 3.1458 | 9E-05  | up   | 0.7015 | 0.0148 |      | 0.4093 | 0.0006 | down | 0.3566 | 0.0002 | down |
| BdWRKY68 | 3.6984 | 0.0409 | up   | 3.5063 | 0.0152 | up   | 0.2698 | 0.0228 | down | 1.83   | 0.013  | up   | 0.7696 | 0.3868 |      |
| BdWRKY69 | 1.7412 | 0.0494 | up   | 3.4877 | 0.0004 | up   | 0.7119 | 0.0281 |      | 0.4371 | 0.0009 | down | 0.9674 | 0.4186 |      |
| BdWRKY70 | 0.3902 | 4E-06  | down | 0.6607 | 0.0107 |      | 0.5654 | 4E-05  | down | 0.1659 | 8E-05  | down | 0.1703 | 4E-06  | down |
| BdWRKY71 | 1.0106 | 0.9962 |      | 0.8972 | 0.733  |      | 0.3993 | 0.0526 |      | 0.4008 | 0.0766 | down | 0.1931 | 0.0066 | down |
| BdWRKY72 | 2.4994 | 0.0027 | up   | 2.6878 | 0.0016 | up   | 0.5526 | 0.0037 | down | 0.4182 | 0.0007 | down | 0.3765 | 0.0003 | down |
| BdWRKY73 | 1.2749 | 0.0159 |      | 2.5083 | 0.0003 | up   | 0.4421 | 0.0002 | down | 0.3534 | 5E-05  | down | 0.337  | 8E-05  | down |
| BdWRKY74 | 0.653  | 0.0845 |      | 4.0877 | 6E-05  | up   | 0.3509 | 0.0004 | down | 0.4882 | 0.004  | down | 0.1912 | 2E-05  | down |
| BdWRKY75 | 2.6629 | 3E-05  | up   | 3.2846 | 0.0002 | up   | 1.1493 | 0.0379 |      | 0.2905 | 4E-06  | down | 0.1281 | 1E-05  | down |
| BdWRKY76 | 0.6945 | 0.1493 |      | 1.4699 | 0.0363 |      | 0.8492 | 0.0355 |      | 0.361  | 0.0004 | down | 0.6932 | 0.0067 |      |
| BdWRKY77 | 2.3559 | 0.0337 | up   | 3.2729 | 0.0269 | up   | 1.5026 | 0.3429 |      | 0.7356 | 0.4345 |      | 1.3949 | 0.5858 |      |
| BdWRKY78 | 0.8144 | 0.0186 |      | 1.5643 | 0.0274 | up   | 0.9827 | 0.0544 |      | 0.5842 | 0.0023 | down | 0.7116 | 6E-05  |      |
| BdWRKY79 | 1.5072 | 0.0016 | up   | 3.032  | 0.0008 | up   | 0.4383 | 5E-05  | down | 0.5568 | 0.0005 | down | 0.499  | 5E-05  | down |
| BdWRKY80 | 3.2629 | 0.0001 | up   | 4.7082 | 4E-05  | up   | 1.5178 | 0.042  | up   | 0.5678 | 0.0405 | down | 0.5799 | 0.0004 | down |
| BdWRKY81 | 78.884 | 7E-06  | up   | 1.0211 | 0.5803 |      | 11.989 | 8E-05  | up   | 0.4325 | 0.0456 | down | 0.6717 | 0.0974 |      |
| BdWRKY82 | 1.1212 | 0.6462 |      | 1.8038 | 0.0009 | up   | 0.8062 | 0.0072 |      | 0.2024 | 0.0007 | down | 0.3672 | 0.0162 | down |
| BdWRKY83 | 0.2413 | 0.0036 | down | 0.5086 | 0.0002 | down | 0.2136 | 1E-06  | down | 0.1814 | 8E-05  | down | 0.2082 | 1E-05  | down |
| BdWRKY84 | 4.4861 | 5E-05  | up   | 1.2136 | 0.7112 |      | 3.0713 | 2E-05  | up   | 0.2014 | 7E-07  | down | 2.002  | 1E-05  | up   |
| BdWRKY85 | 3.2396 | 0.0003 | up   | 2.2692 | 6E-05  | up   | 1.3535 | 0.0041 |      | 0.6051 | 0.0028 | down | 0.6443 | 0.003  | down |
| BdWRKY86 | 0.6648 | 0.0016 |      | 0.3425 | 1E-05  | down | 0.1364 | 1E-06  | down | 0.1734 | 1E-05  | down | 0.2914 | 9E-05  | down |

**Supplementary table 4C. Expression data of the BdWRKY family genes after phytohormone treatment.**

| gene<br>name | MeJA        |         |            | 6-BA        |         |            | SA          |         |            | ABA         |         |            |
|--------------|-------------|---------|------------|-------------|---------|------------|-------------|---------|------------|-------------|---------|------------|
|              | fold-change | p-value | regulation | fold-change | p-value | regulation | fold-change | p-value | regulation | fold-change | p-value | regulation |
| BdWRKY1      | 0.0604      | 0.0002  | down       | 0.7272      | 0.0544  |            | 0.0597      | 3E-06   | down       | 0.0684      | 3E-05   | down       |
| BdWRKY2      | 0.4506      | 0.0002  | down       | 1.8288      | 0.0005  | up         | 0.4392      | 5E-05   | down       | 0.2545      | 0.0039  | down       |
| BdWRKY3      | 0.4661      | 0.0001  | down       | 2.5057      | 0.0011  | up         | 0.4315      | 9E-05   | down       | 0.372       | 0.0016  | down       |
| BdWRKY4      | 0.4857      | 0.0004  | down       | 1.5811      | 4E-05   | up         | 0.3642      | 7E-08   | down       | 0.1911      | 1E-05   | down       |
| BdWRKY5      | 0.1352      | 6E-05   | down       | 0.6246      | 0.0044  | down       | 0.1607      | 3E-05   | down       | 0.0583      | 0.0002  | down       |
| BdWRKY6      | 0.3759      | 1E-04   | down       | 1.2228      | 0.003   |            | 0.377       | 0.0099  | down       | 0.2526      | 4E-06   | down       |
| BdWRKY7      | 0.1928      | 0.0001  | down       | 0.1734      | 3E-06   | down       | 0.1161      | 5E-07   | down       | 0.0911      | 1E-05   | down       |
| BdWRKY8      | 0.2928      | 1E-07   | down       | 2.182       | 0.0006  | up         | 0.2852      | 0.0004  | down       | 0.2762      | 1E-05   | down       |
| BdWRKY9      | 0.2215      | 0.0027  | down       | 0.9885      | 0.488   |            | 0.108       | 1E-05   | down       | 0.0604      | 0.0018  | down       |
| BdWRKY10     | 1.7735      | 0.016   | up         | 4.3322      | 5E-06   | up         | 1.5047      | 0.0063  | up         | 0.1658      | 4E-06   | down       |
| BdWRKY11     | 0.4202      | 7E-05   | down       | 1.671       | 0.0177  | up         | 1.9632      | 0.0005  | up         | 0.2409      | 1E-04   | down       |
| BdWRKY12     | 0.322       | 0.0034  | down       | 1.5959      | 0.0134  | up         | 0.2586      | 0.0005  | down       | 0.2541      | 3E-07   | down       |
| BdWRKY13     | 0.687       | 0.0423  |            | 1.8903      | 5E-05   | up         | 0.33        | 0.0003  | down       | 0.1516      | 2E-05   | down       |
| BdWRKY14     | 0.4788      | 4E-05   | down       | 1.4013      | 0.1512  |            | 13.935      | 7E-07   | up         | 0.3931      | 0.001   | down       |
| BdWRKY15     | 1.8669      | 0.0458  | up         | 2.2967      | 0.0009  | up         | 0.9545      | 0.9868  |            | 0.1856      | 0.0002  | down       |
| BdWRKY16     | 0.3798      | 0.0001  | down       | 2.1294      | 0.0021  | up         | 0.3048      | 0.0036  | down       | 0.2713      | 0.0011  | down       |
| BdWRKY17     | 0.5784      | 0.0003  |            | 2.2743      | 0.0192  | up         | 0.4404      | 0.0026  | down       | 0.1989      | 0.0006  | down       |
| BdWRKY18     | 0.2826      | 0.0075  | down       | 1.7241      | 0.0372  | up         | 0.2398      | 0.0016  | down       | 0.4197      | 0.0018  | down       |
| BdWRKY19     | 0.1124      | 3E-06   | down       | 0.158       | 5E-06   | down       | 0.0767      | 8E-06   | down       | 0.0229      | 5E-07   | down       |
| BdWRKY20     | 0.3853      | 2E-06   | down       | 0.852       | 0.0173  |            | 0.3848      | 0.0008  | down       | 0.0458      | 2E-07   | down       |
| BdWRKY21     | 0.202       | 1E-05   | down       | 1.5965      | 0.0008  | up         | 0.4063      | 0.0002  | down       | 0.2442      | 0.0002  | down       |
| BdWRKY22     | 0.0853      | 0.0061  | down       | 0.2813      | 0.0003  | down       | 0.0617      | 7E-06   | down       | 0.054       | 0.0002  | down       |
| BdWRKY23     | 0.1511      | 4E-05   | down       | 0.6073      | 0.0044  | down       | 0.1333      | 7E-05   | down       | 0.1103      | 4E-05   | down       |
| BdWRKY24     | 0.32        | 6E-08   | down       | 1.3997      | 0.029   |            | 0.2914      | 0.0003  | down       | 0.2687      | 0.0012  | down       |
| BdWRKY25     | 2.3697      | 0.012   | up         | 3.8433      | 0.0009  | up         | 1.5127      | 0.0462  | up         | 1.5387      | 0.02    | up         |
| BdWRKY26     | 0.5399      | 0.0002  | down       | 1.0828      | 0.2816  |            | 0.462       | 2E-05   | down       | 0.2251      | 0.0004  | down       |
| BdWRKY27     | 0.4546      | 2E-05   | down       | 1.7738      | 0.0076  | up         | 0.155       | 7E-05   | down       | 0.094       | 2E-08   | down       |

|          |        |        |      |        |        |      |        |        |      |        |        |      |
|----------|--------|--------|------|--------|--------|------|--------|--------|------|--------|--------|------|
| BdWRKY28 | 0.3433 | 0.0054 | down | 1.2984 | 0.318  |      | 0.5075 | 0.0055 | down | 0.0157 | 9E-06  | down |
| BdWRKY29 | 0.2469 | 0.002  | down | 2.1831 | 0.0082 | up   | 0.5134 | 0.0653 |      | 0.2967 | 0.0016 | down |
| BdWRKY30 | 0.1751 | 4E-06  | down | 1.7528 | 3E-05  | up   | 1.5529 | 0.0153 | up   | 0.5021 | 0.0035 | down |
| BdWRKY31 | 0.1929 | 3E-07  | down | 0.7383 | 0.0084 |      | 0.2116 | 3E-05  | down | 0.1651 | 3E-05  | down |
| BdWRKY32 | 0.3021 | 3E-06  | down | 0.5003 | 4E-06  | down | 0.0552 | 0.0002 | down | 0.0678 | 0.0006 | down |
| BdWRKY33 | 0.4803 | 0.003  | down | 1.2046 | 0.3805 |      | 0.3002 | 0.0002 | down | 0.4048 | 0.0283 | down |
| BdWRKY34 | 0.1622 | 0.0276 | down | 0.5912 | 0.3172 |      | 0.118  | 0.0158 | down | 0.1071 | 0.015  | down |
| BdWRKY35 | 0.7481 | 0.1231 |      | 0.8352 | 0.0755 |      | 0.1279 | 0.0002 | down | 0.4429 | 0.0005 | down |
| BdWRKY36 | 0.5306 | 0.0007 | down | 1.9208 | 0.0028 | up   | 0.2947 | 0.0006 | down | 0.2137 | 0.0002 | down |
| BdWRKY37 | 0.6841 | 0.2163 |      | 1.6139 | 0.0325 | up   | 0.2292 | 0.0023 | down | 0.1539 | 0.0017 | down |
| BdWRKY38 | 0.2558 | 1E-06  | down | 1.5398 | 0.0046 | up   | 0.3211 | 4E-06  | down | 0.2601 | 0.0005 | down |
| BdWRKY39 | 0.2319 | 0.0004 | down | 1.5726 | 0.0103 | up   | 0.3051 | 2E-05  | down | 0.2482 | 0.0007 | down |
| BdWRKY40 | 0.3088 | 1E-05  | down | 1.014  | 0.4224 |      | 0.1743 | 3E-07  | down | 0.043  | 3E-06  | down |
| BdWRKY41 | 0.2675 | 0.0003 | down | 1.7266 | 0.0335 | up   | 0.2032 | 0.0002 | down | 0.1465 | 0.0012 | down |
| BdWRKY42 | 0.1187 | 0.0045 | down | 3.4195 | 0.0098 | up   | 0.9268 | 0.6529 |      | 0.5734 | 0.1124 |      |
| BdWRKY43 | 0.4615 | 0.0003 | down | 2.4369 | 0.0022 | up   | 0.4841 | 0.0013 | down | 0.5344 | 0.0116 | down |
| BdWRKY44 | 0.6242 | 0.0014 | down | 1.6765 | 0.0262 | up   | 7.0313 | 1E-06  | up   | 0.1237 | 0.0005 | down |
| BdWRKY45 | 0.1097 | 0.0002 | down | 0.9531 | 0.7734 |      | 0.213  | 0.0016 | down | 0.1883 | 0.0003 | down |
| BdWRKY46 | 0.1702 | 3E-06  | down | 0.8306 | 0.2331 |      | 0.1529 | 1E-05  | down | 0.1681 | 5E-05  | down |
| BdWRKY47 | 0.2938 | 0.0002 | down | 1.051  | 0.9375 |      | 0.2924 | 3E-05  | down | 0.293  | 6E-05  | down |
| BdWRKY48 | 0.3767 | 3E-05  | down | 0.923  | 0.8853 |      | 0.2792 | 4E-05  | down | 0.305  | 0.0006 | down |
| BdWRKY49 | 0.2434 | 6E-05  | down | 1.2479 | 0.3618 |      | 0.3991 | 0.0005 | down | 0.9336 | 0.5848 |      |
| BdWRKY50 | 0.0275 | 4E-06  | down | 0.55   | 0.002  | down | 0.1114 | 2E-05  | down | 0.0808 | 0.0002 | down |
| BdWRKY51 | 0.0357 | 6E-10  | down | 0.1538 | 6E-06  | down | 0.0264 | 3E-07  | down | 0.0279 | 7E-09  | down |
| BdWRKY52 | 0.0377 | 1E-05  | down | 0.1708 | 0.0001 | down | 0.0753 | 1E-06  | down | 0.0228 | 1E-05  | down |
| BdWRKY53 | 0.3119 | 0.0002 | down | 1.4078 | 0.0015 |      | 0.4562 | 0.0031 | down | 0.3078 | 9E-05  | down |
| BdWRKY54 | 0.3082 | 0.0003 | down | 1.9195 | 0.0039 | up   | 0.5636 | 0.0126 | down | 0.3668 | 0.0017 | down |
| BdWRKY55 | 0.8073 | 0.0615 |      | 1.6712 | 0.0018 | up   | 0.4844 | 0.0053 | down | 0.4022 | 0.0009 | down |
| BdWRKY56 | 0.3159 | 8E-05  | down | 1.2996 | 0.0538 |      | 0.2271 | 0.001  | down | 0.2304 | 0.0014 | down |
| BdWRKY57 | 0.2458 | 3E-05  | down | 0.8362 | 0.3999 |      | 0.2609 | 5E-05  | down | 0.3698 | 0.0061 | down |
| BdWRKY58 | 0.292  | 6E-05  | down | 0.3632 | 0.0004 | down | 0.137  | 5E-06  | down | 0.3743 | 0.002  | down |
| BdWRKY59 | 0.6572 | 0.084  |      | 4.0837 | 0.0009 | up   | 0.4069 | 0.0031 | down | 0.0881 | 6E-06  | down |

|          |        |        |      |        |        |      |        |        |      |        |        |      |
|----------|--------|--------|------|--------|--------|------|--------|--------|------|--------|--------|------|
| BdWRKY60 | 0.2322 | 5E-05  | down | 0.9268 | 0.6634 |      | 0.3511 | 0.0002 | down | 0.3241 | 0.0013 | down |
| BdWRKY61 | 0.2551 | 7E-06  | down | 0.96   | 0.0994 |      | 0.4181 | 1E-04  | down | 0.3381 | 0.0004 | down |
| BdWRKY62 | 0.3471 | 1E-06  | down | 0.8125 | 0.0127 |      | 0.1727 | 2E-07  | down | 0.1771 | 3E-05  | down |
| BdWRKY63 | 0.2493 | 9E-06  | down | 0.6041 | 2E-05  | down | 0.1668 | 2E-06  | down | 0.2289 | 3E-06  | down |
| BdWRKY64 | 0.256  | 0.1294 |      | 0.7437 | 0.0001 |      | 0.1576 | 0.0081 | down | 0.264  | 0.2858 |      |
| BdWRKY65 | 0.4337 | 0.0703 |      | 2.0186 | 0.0315 | up   | 0.6159 | 0.438  |      | 0.8101 | 0.4671 |      |
| BdWRKY66 | 0.1966 | 5E-06  | down | 0.7504 | 0.1142 |      | 0.206  | 2E-06  | down | 0.3012 | 0.0003 | down |
| BdWRKY67 | 0.3321 | 0.0013 | down | 1.6991 | 0.0104 | up   | 0.3713 | 0.0003 | down | 0.3545 | 0.0002 | down |
| BdWRKY68 | 0.2422 | 0.0438 | down | 0.6587 | 0.4248 |      | 0.3044 | 0.0453 | down | 0.5192 | 0.226  |      |
| BdWRKY69 | 0.4842 | 0.0052 | down | 1.4113 | 0.013  |      | 0.3811 | 0.0011 | down | 0.2443 | 0.0013 | down |
| BdWRKY70 | 0.266  | 5E-05  | down | 0.971  | 0.2459 |      | 0.1558 | 0.0001 | down | 0.0382 | 2E-07  | down |
| BdWRKY71 | 0.1779 | 0.0134 | down | 0.3393 | 0.0715 |      | 0.0443 | 0.0008 | down | 0.3043 | 0.0257 | down |
| BdWRKY72 | 0.362  | 0.0035 | down | 0.6782 | 0.035  |      | 0.1628 | 6E-05  | down | 0.1767 | 6E-05  | down |
| BdWRKY73 | 0.5578 | 0.0005 | down | 0.8225 | 0.0983 |      | 0.1337 | 1E-05  | down | 0.1777 | 2E-05  | down |
| BdWRKY74 | 0.1561 | 0.0001 | down | 1.0402 | 0.9378 |      | 0.2161 | 0.0007 | down | 0.3613 | 0.0015 | down |
| BdWRKY75 | 0.396  | 8E-06  | down | 2.2778 | 0.0003 | up   | 0.2005 | 0.0005 | down | 0.0978 | 1E-05  | down |
| BdWRKY76 | 0.2004 | 0.0018 | down | 1.107  | 0.855  |      | 0.6585 | 0.0117 | down | 0.4313 | 0.0154 | down |
| BdWRKY77 | 0.7285 | 0.4135 |      | 1.431  | 0.3853 |      | 0.3517 | 0.0373 | down | 0.4281 | 0.0697 |      |
| BdWRKY78 | 0.3241 | 4E-06  | down | 0.9835 | 0.0433 |      | 0.2731 | 0.0001 | down | 0.5431 | 0.0004 | down |
| BdWRKY79 | 0.2923 | 6E-07  | down | 1.5577 | 0.0002 | up   | 0.6958 | 0.0049 |      | 0.4154 | 1E-05  | down |
| BdWRKY80 | 0.5697 | 0.0059 | down | 1.6135 | 0.0062 | up   | 0.3518 | 0.0002 | down | 0.3253 | 0.0064 | down |
| BdWRKY81 | 0.4806 | 0.0072 | down | 1.9188 | 0.0085 | up   | 0.4842 | 0.0036 | down | 0.4049 | 0.002  | down |
| BdWRKY82 | 0.2939 | 0.0011 | down | 0.7828 | 0.1776 |      | 0.2372 | 0.0019 | down | 0.091  | 0.0016 | down |
| BdWRKY83 | 0.5066 | 0.0019 | down | 0.3664 | 0.0002 | down | 4.1154 | 1E-05  | up   | 0.3274 | 0.0004 | down |
| BdWRKY84 | 0.285  | 0.0007 | down | 0.47   | 5E-05  | down | 0.3605 | 1E-04  | down | 0.128  | 6E-07  | down |
| BdWRKY85 | 0.6952 | 0.0026 |      | 2.1444 | 0.0019 | up   | 0.5534 | 0.0009 | down | 0.261  | 2E-05  | down |
| BdWRKY86 | 0.3968 | 6E-05  | down | 0.2535 | 4E-05  | down | 1.641  | 0.0043 | up   | 0.1207 | 1E-05  | down |
